# Supplementary material
Source: PubMed Central journal article supplement (PMC7684765)
Supplement: NIHMS1644655-supplement-Supporting_Information.pdf [file NIHMS1644655-supplement-Supporting_Information.pdf]

## SUPPORTING INFORMATION

# Discovery of the first Vitamin K analog as a potential treatment of pharmaco-resistant seizures

*Xiaoyang Li<sup>1,\*</sup>, Richard A. Himes<sup>2</sup>, Lyndsey C. Prosser<sup>2</sup>, Charleston F. Christie<sup>3</sup>, Emma Watt<sup>2</sup>, Sharon F. Edwards<sup>4</sup>, Cameron S. Metcalf<sup>4</sup>, Peter J. West<sup>4</sup>, Karen S. Wilcox<sup>4</sup>, Sherine S.L. Chan<sup>3,5,\*</sup>, C. James Chow<sup>3,5,\*</sup>*

<sup>1</sup>Ocean University of China, School of Medicine and Pharmacy, Qingdao, Shandong, 266071, China

<sup>2</sup>Department of Chemistry and Biochemistry, College of Charleston, 66 George Street, Charleston, South Carolina 29424, USA

<sup>3</sup>Neuroene Therapeutics, Mount Pleasant, South Carolina 29464, USA

<sup>4</sup>Anticonvulsant Drug Development (ADD) Program, Department of Pharmacology & Toxicology, University of Utah, 84112, USA

<sup>5</sup>Department of Drug Discovery and Biomedical Sciences, College of Pharmacy, Medical University of South Carolina, Charleston, South Carolina 29425, USA

### Contents

**Table S1.** Compound **3i** in the acute, electrically evoked mouse seizure models.----- Page S2

**Table S2.** Time course experiment and toxicity of **3d** in mouse.-----Page S2

**Table S3.** Brain/plasma concentration ratio of **2h**.-----Page S3

**Table S4.** Brain/plasma concentration ratio of **3d** in mouse and plasma.-----Page S3

**Figure S1.** Recurrent epileptiform discharges (REDs) assay of **3d**.-----Page S4

**Figure S2.** IC<sub>50</sub> value of **3d** and positive control Verapamil against hERG. -----page S4

**Figure S3.** Pharmacokinetic data of **3d** at concentration of 400 mg/kg and 200 mg/kg with i.p. administration in Male CF-1 Mice.-----page S5

**Figure S4.** VK3 and **3d** were subjected with 2-mercaptoethanol.-----page S6

<sup>1</sup>N NMR and <sup>13</sup>C NMR Spectrums for all the target compounds.-----page S6-page S31

**HPLC traces and purity of the target compounds**----- page S31-page S43

**Reference**----- page S43-page S44

**Table S1.** Compound **3l** in the acute, electrically evoked mouse seizure models.

| Test          | Dose      | Time    | N/T <sup>a</sup> |
|---------------|-----------|---------|------------------|
|               | 100 mg/kg | 0.25 hr | 0/8              |
| Rotarod (Tox) | 100 mg/kg | 0.5 hr  | 0/8              |
|               | 100 mg/kg | 1 hr    | 0/8              |
|               | 100 mg/kg | 0.25 hr | 1/8              |
| 6 Hz 22 mA    | 100 mg/kg | 0.5 hr  | 1/8              |
|               | 100 mg/kg | 1 hr    | 0/8              |
|               | 200 mg/kg | 0.25 hr | 0/8              |
| Rotarod (Tox) | 200 mg/kg | 0.5 hr  | 0/8              |
|               | 200 mg/kg | 1 hr    | 0/8              |
|               | 200 mg/kg | 0.25 hr | 2/8              |
| 6 Hz 22 mA    | 200 mg/kg | 0.5 hr  | 3/8              |
|               | 200 mg/kg | 1 hr    | 1/8              |
| Rotarod (Tox) | 400 mg/kg | 0.5 hr  | 0/8              |
| 6 Hz 22 mA    | 400 mg/kg | 0.5 hr  | 2/8              |

Note: <sup>a</sup>N = number of animals exhibiting toxicity or number of animals protected and T = number of animals tested

**Table S2.** Time course experiment and toxicity of **3d** in mouse.

| Test              | Dose      | Time    | N/T |
|-------------------|-----------|---------|-----|
| Rotarod (Tox)     | 400 mg/kg | 0.25 hr | 1/8 |
| <b>6 Hz 32 mA</b> | 400 mg/kg | 0.25 hr | 7/8 |
| Rotarod (Tox)     | 400 mg/kg | 0.5 hr  | 2/8 |
| <b>6 Hz 32 mA</b> | 400 mg/kg | 0.5 hr  | 7/8 |
| Rotarod (Tox)     | 400 mg/kg | 1 hr    | 1/8 |
| <b>6 Hz 32 mA</b> | 400 mg/kg | 1 hr    | 8/8 |

Note: <sup>a</sup>N = number of animals exhibiting toxicity (Rotarod) or protected animals and T = number of animals tested.

**Table S3.** Brain/plasma concentration ratio of **2h**.

| Compounds No. | Matrix | Time  | Mean Tissue | Brain/plasma concentration ratio <sup>a</sup> |
|---------------|--------|-------|-------------|-----------------------------------------------|
| <b>2h</b>     | Plasma | 0.5 h | 1014 ng/mL  | 0.325                                         |
|               | Brain  | 0.5 h | 330 ng/g    |                                               |

Note: **2h** was administrated by intravenous injection (iv) at the concentration of 5 mg/kg. Sample was obtained after 30 min of administration.

**Table S4.** Brain/plasma concentration ratio of **3d** in mouse and plasma.

| Compounds No.   | Matrix       | Tested Concentration | % Free        | % Bound      |
|-----------------|--------------|----------------------|---------------|--------------|
| <b>3d</b>       | Mouse plasma | 1 µg/mL              | 1.55 ± 0.052  | 98.5 ± 0.052 |
|                 | Human plasma | 1 µg/mL              | 2.57 ± 0.332  | 97.4 ± 0.332 |
| <b>Warfarin</b> | Mouse plasma | 1 µg/mL              | 7.88 ± 0.56   | 92.1 ± 0.56  |
|                 | Human plasma | 1 µg/mL              | 0.058 ± 0.003 | 99.4 ± 0.003 |

Note: The assay was conducted with male mouse (CD-1) and human plasma. A Rapid Equilibrium Dialysis (RED) plate from Thermo Scientific was utilized to determine percentage of plasma protein binding. **3d** and positive control Warfarin were tested in duplicate at a final concentration of 1 µg/ml. The plasma with K<sub>2</sub>EDTA anticoagulant was used in the assay. The assay consisted of adding 100 µL of spiked plasma in the donor (red) sample chamber and applying 300 µL of PBS (pH = 7.4) buffer into the receiver chamber of the RED plate. The samples were then covered with aluminum sealing foil and incubated at 37°C for 4 hours on an orbital shaker at 200 rpm. After incubation, 25 µL of each buffer and plasma sample was placed into cluster tubes. In order to matrixmatch the samples, 25 µL of blank PBS was added to all of the respective plasma samples and 25 µL of blank plasma was applied to all of the buffer samples. Then 150 µL of ACN with 1.0 µg/ml propranolol (internal standard) was added to all samples. The samples were then centrifuged at 2000 g for 10 min prior to analysis of the supernatant by LC-MS/MS.

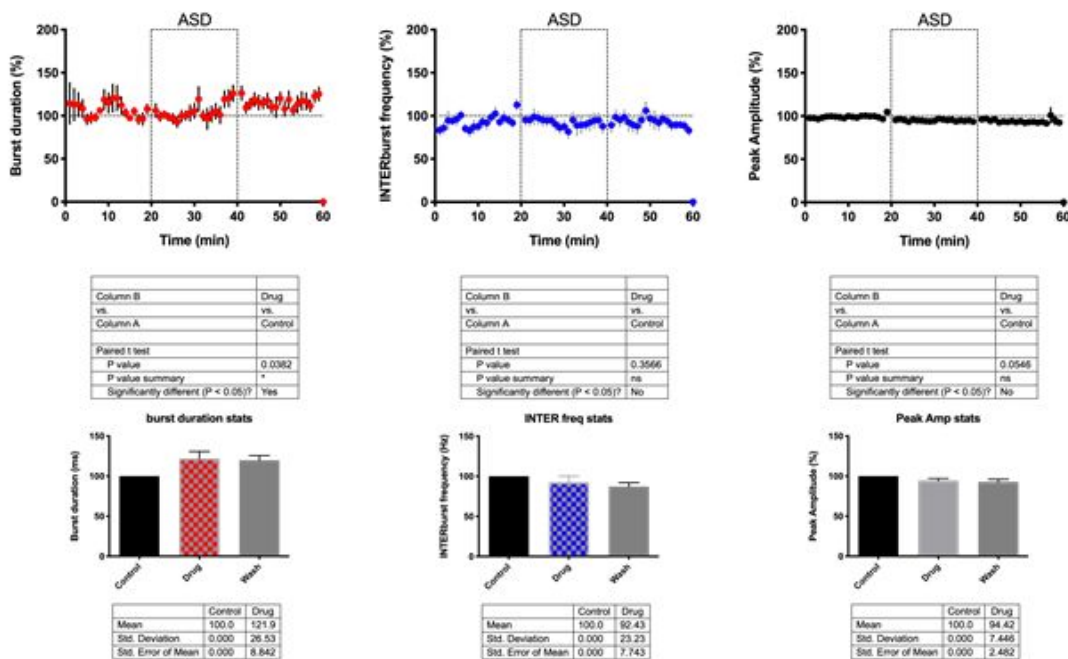

**Figure S1.** Independent recordings were made in 9 brain slices in this assay, and the average of the data recorded from these slices are presented here. 10  $\mu\text{M}$  compound **3d** failed to significantly alter the burst frequency or amplitude of recurrent epileptiform discharges (REDs) in this assay. The small significant increase of burst duration is not likely to be biologically significant and is more likely due to a small, brief, non-specific change that is not due to compound **3d**. Methods: Horizontal brain slices containing the medial entorhinal cortex (mEC) were prepared from kainite-induced status epilepticus model of temporal lobe epilepsy rats. REDs were recorded from the superficial layers. Compound **3d** was treated and the effects on the REDs' burst duration, frequency, and peak amplitude were measured. Detailed methods are described in previous study.<sup>1</sup>

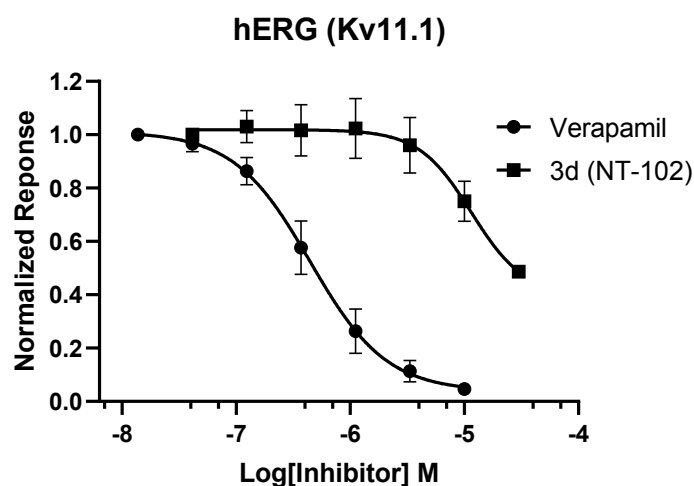

**Figure S2.**  $\text{IC}_{50}$  value of **3d** and positive control Verapamil against hERG. hERG inhibitory  $\text{IC}_{50}$  of **3d** is approximately 30  $\mu\text{M}$  comparing to the positive control Verapamil at 400 nM. Methods:  $1.5 \times 10^5$  HEK-293 cells stably expressing the hERG channel were plated onto sterile

glass coverslips in 35 mm<sup>2</sup> dishes. The dishes were stored in at 37 °C in 5% CO<sub>2</sub> until use. Manual patch clamp technique was used to assess the effect on hERG currents in the whole-cell configuration at 35 ± 2 °C. Corresponding vehicle for all concentrations was 0.1% DMSO and was investigated in 3 cells. Compound **3d** was tested in 6-concentration IC<sub>50</sub> mode, average IC<sub>50</sub> (n = 3 cells) with 3-fold serial dilution starting at 30 μM. The positive control Verapamil was tested in 6-concentration IC<sub>50</sub> mode, average IC<sub>50</sub> (n = 3 cells) with 3-fold dilution starting at 10 μM. Cells were exposed to the test item for approximately 10 min of hERG tail currents were elicited by voltage jumps from -75 mV to 10 mV (500 ms) and then to -40 mV (500 ms) at 0.1 Hz. The composition of the external solution was (in mM): 130 NaCl, 10 HEPES, 5 KCl, 1 MgCl<sub>2</sub>\*6H<sub>2</sub>O, 1 CaCl<sub>2</sub>\*H<sub>2</sub>O, 12.5 dextrose; pH adjusted to 7.4 with 5 M NaOH; ~280 mOsM. The composition of the internal solution was (in mM): 120 K-gluconate, 20 KCl, 10 HEPES, 5 EGTA, 1.5 MgATP; pH adjusted to 7.3 with 1 M KOH; ~280 mOsM. Data capturing and analysis was performed by using Pulse (Heka Electronics, Germany) and Excel. IC<sub>50</sub> values were calculated based on a sigmoidal dose-response model with variable slope.<sup>2</sup>

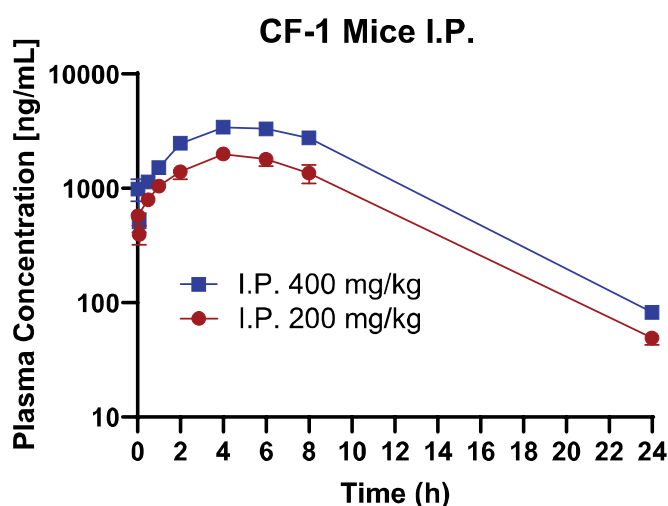

**Figure S3.** Pharmacokinetic data of **3d** at concentration of 400 mg/kg and 200 mg/kg with ip administration in Male CF-1 Mice. The dose formulation is 95% Miglyol 840: 5% DMSO. C<sub>max</sub> of 400 mg/kg administration is 3440 ng/mL (14.1 μM), C<sub>max</sub> of 200 mg/kg administration is 2007 ng/mL (8.2 μM). As brain tissue binding ratio of **3d** is 98.5% (data not shown), the free EC<sub>50</sub> in mice is approximately 123 nM.

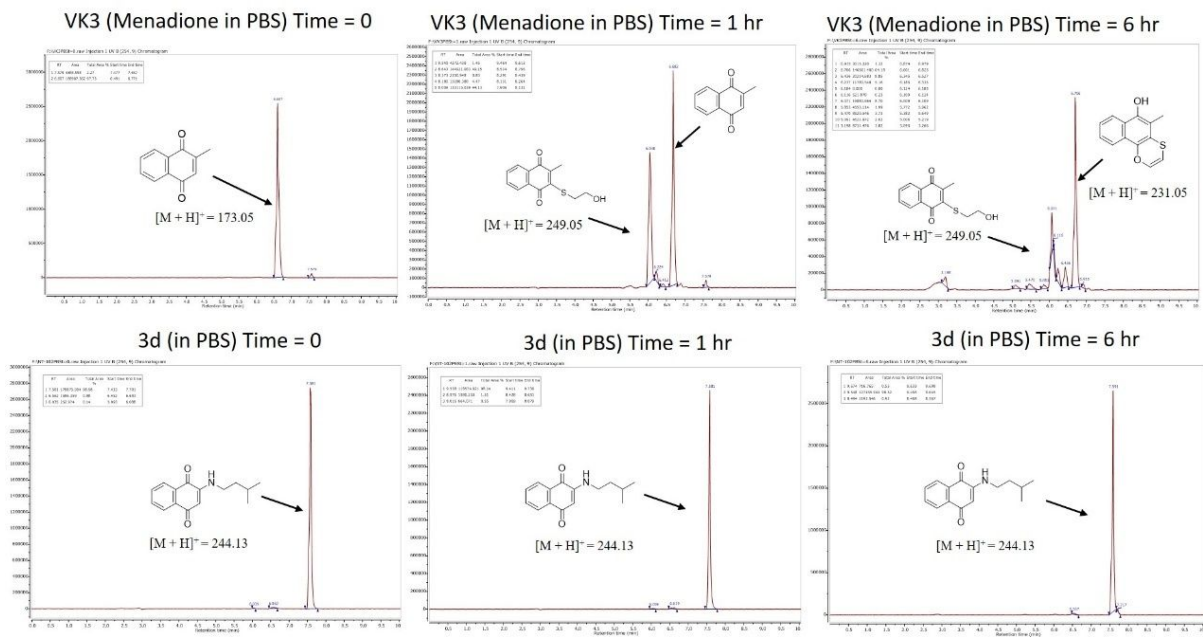

**Figure S4.** VK3 and **3d** were subjected with 2-mercaptoethanol. VK3 rapidly reacts with 2-mercaptoethanol, while our lead compound **3d** does not react with thiol at all over a 6 h period.

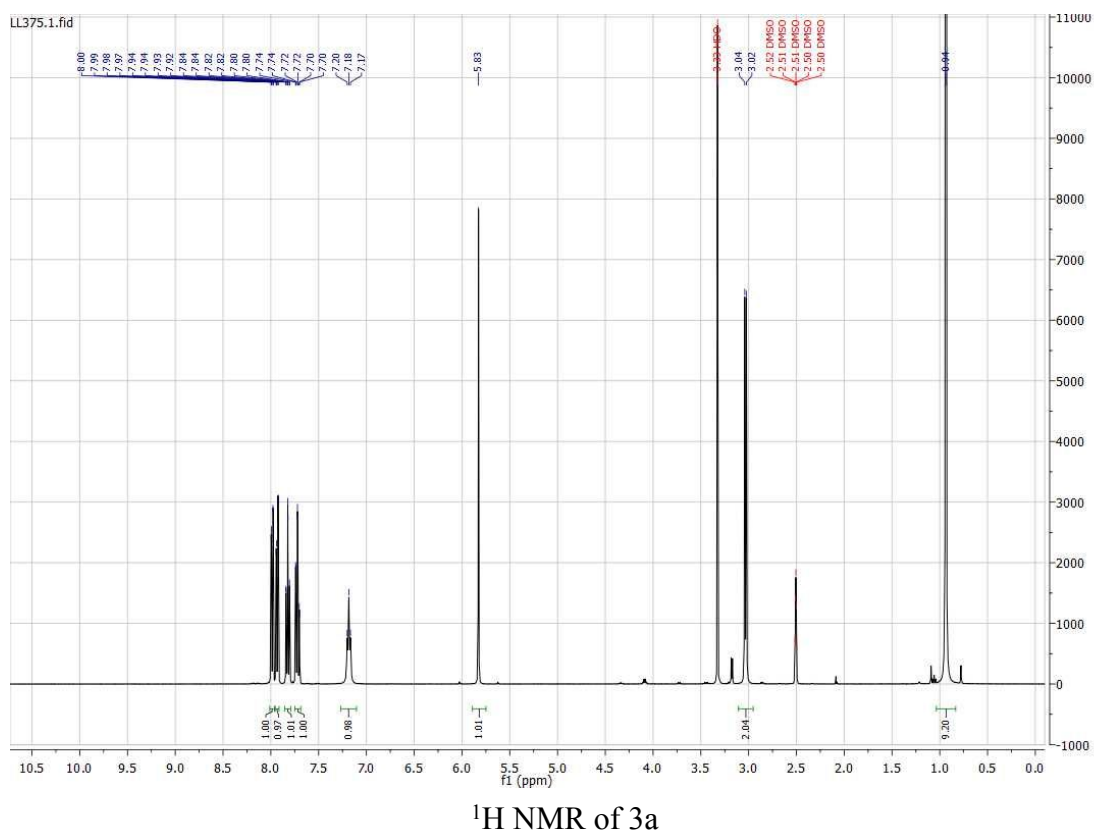

$^1\text{H}$  NMR of **3a**

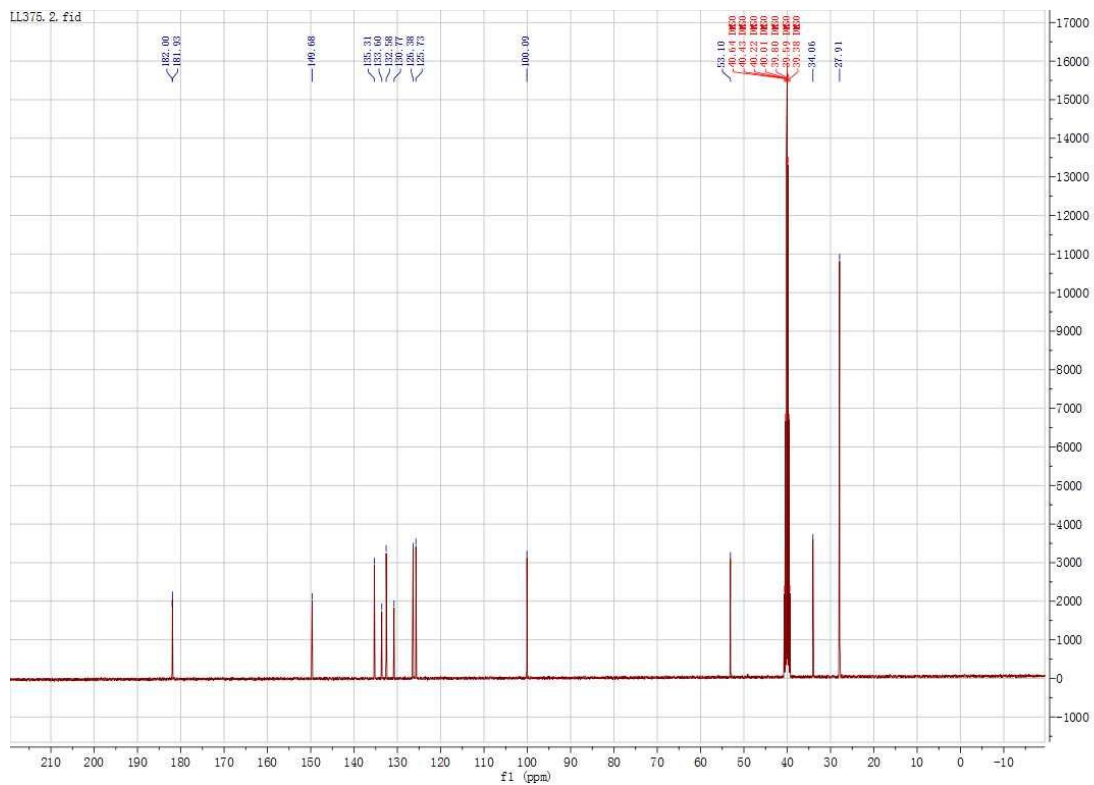

$^{13}\text{C}$  NMR of 3a

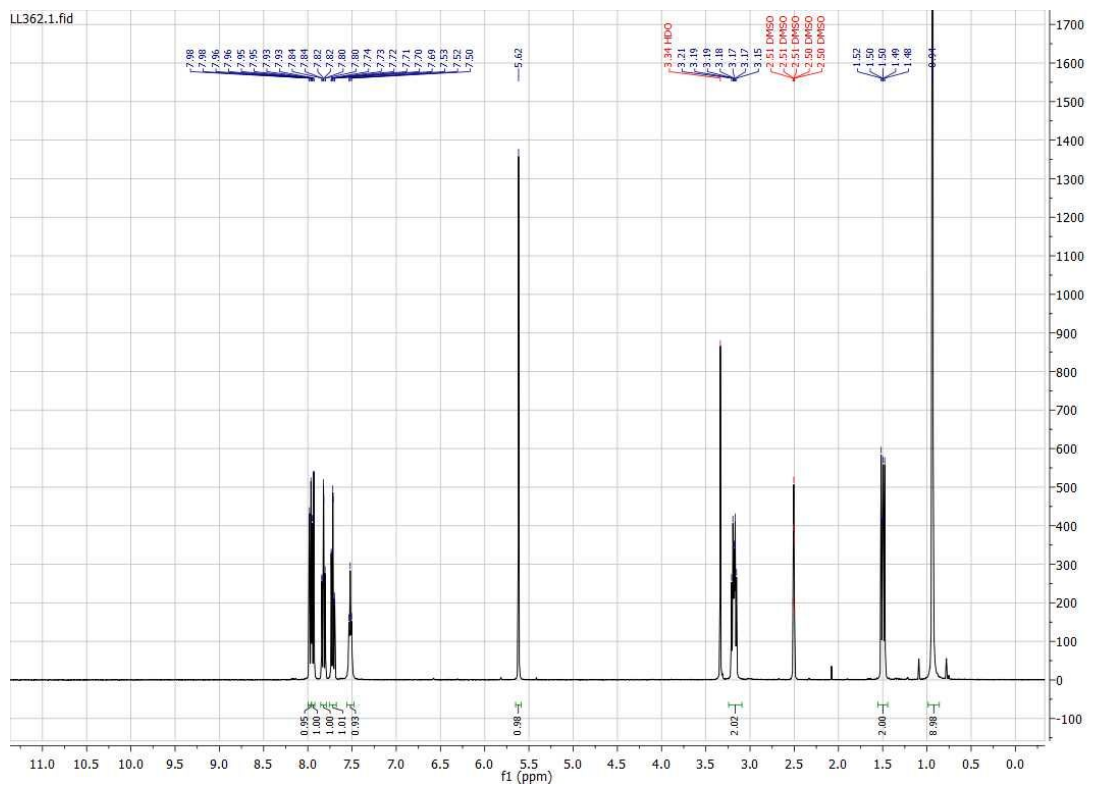

$^1\text{H}$  NMR of 3b

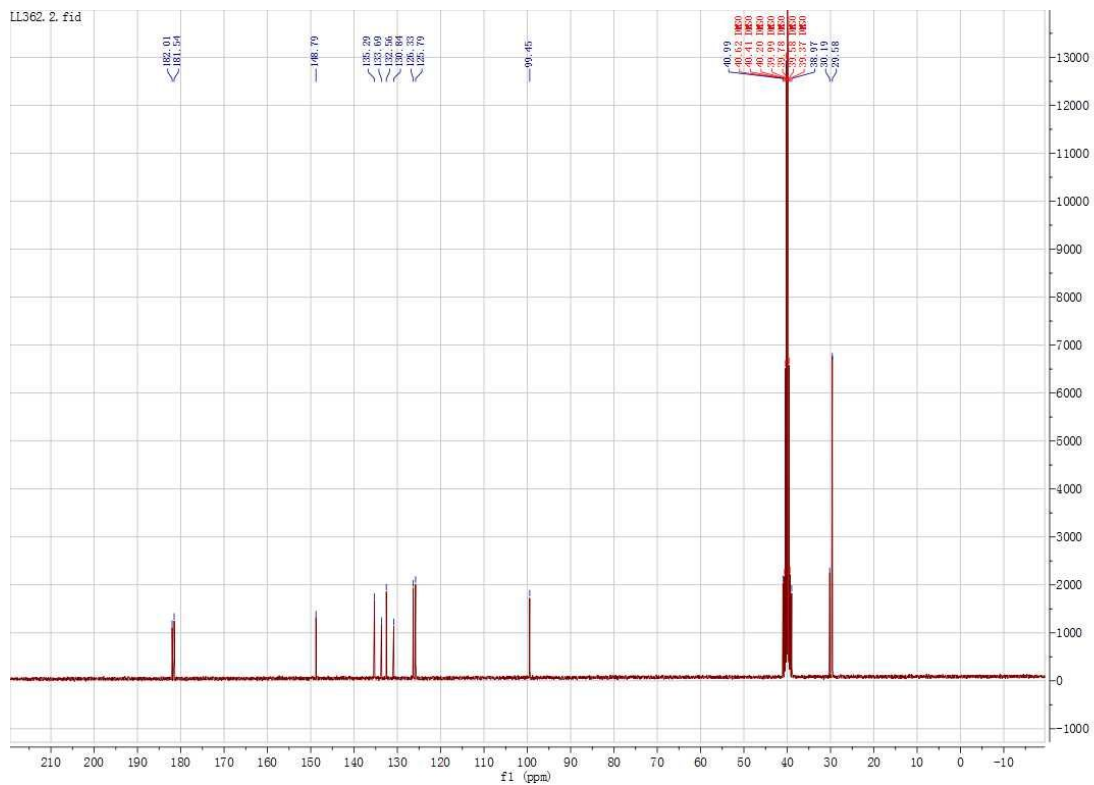

<sup>13</sup>C NMR of 3b

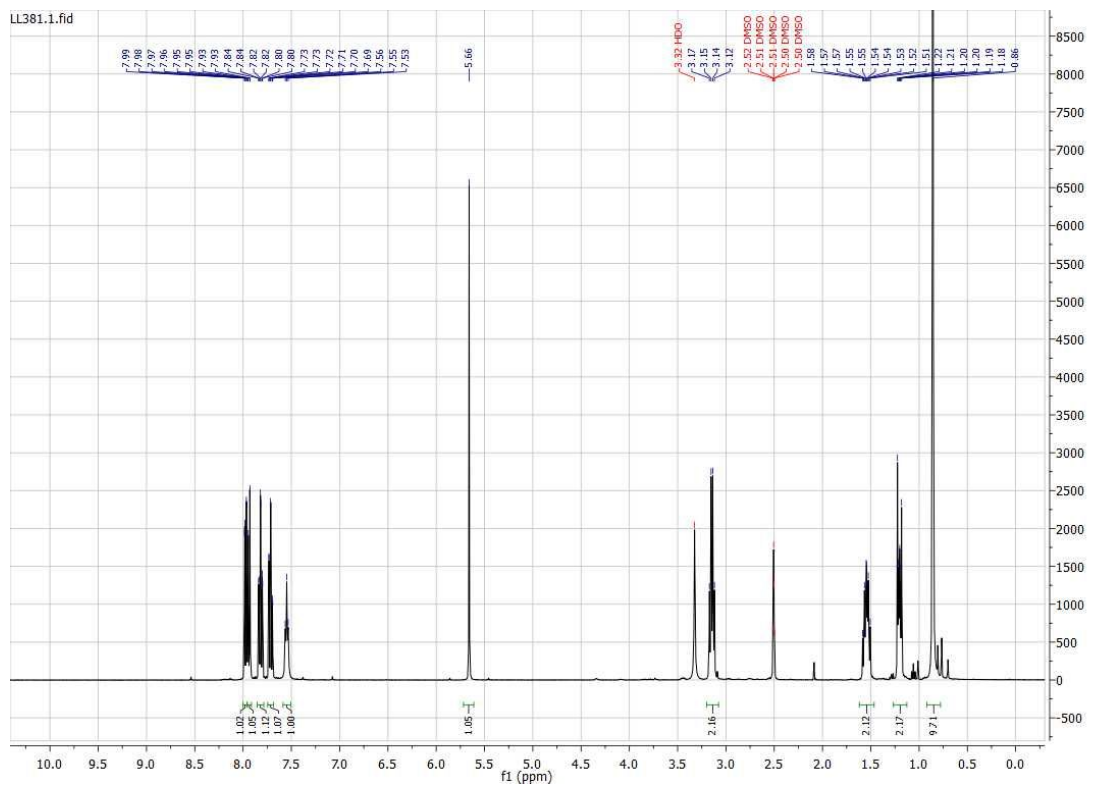

<sup>1</sup>H NMR of 3c



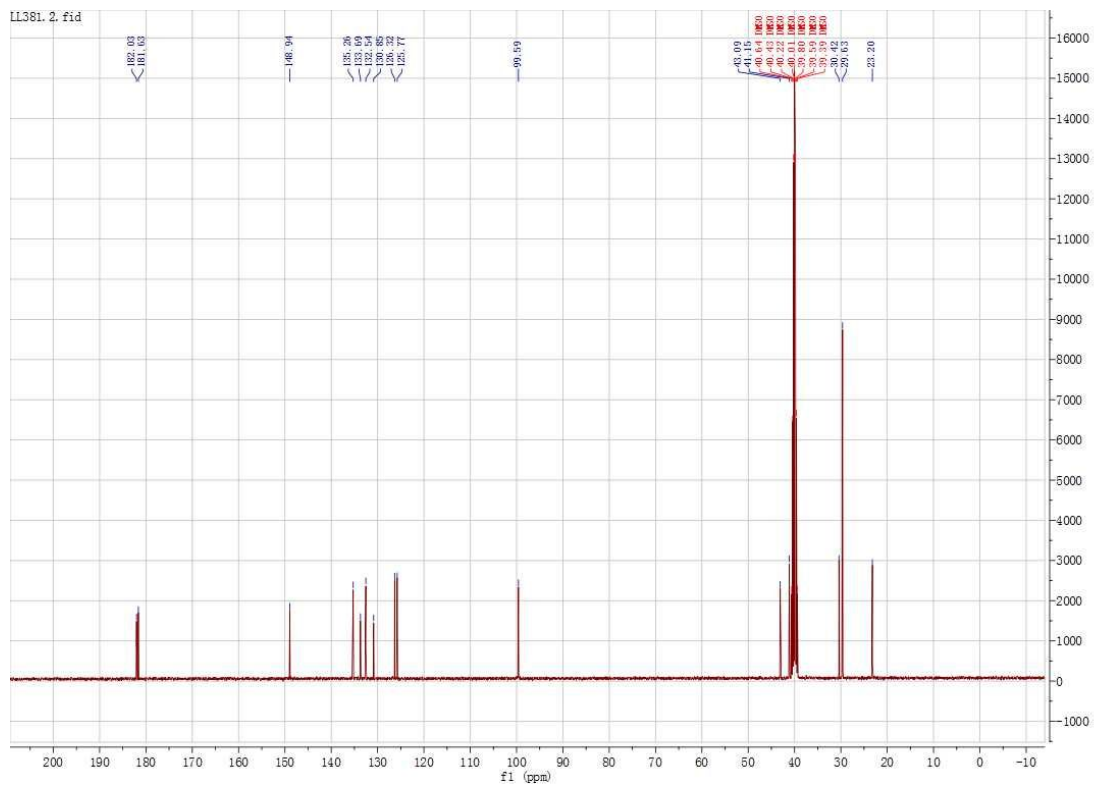

$^{13}\text{C}$  NMR of 3c

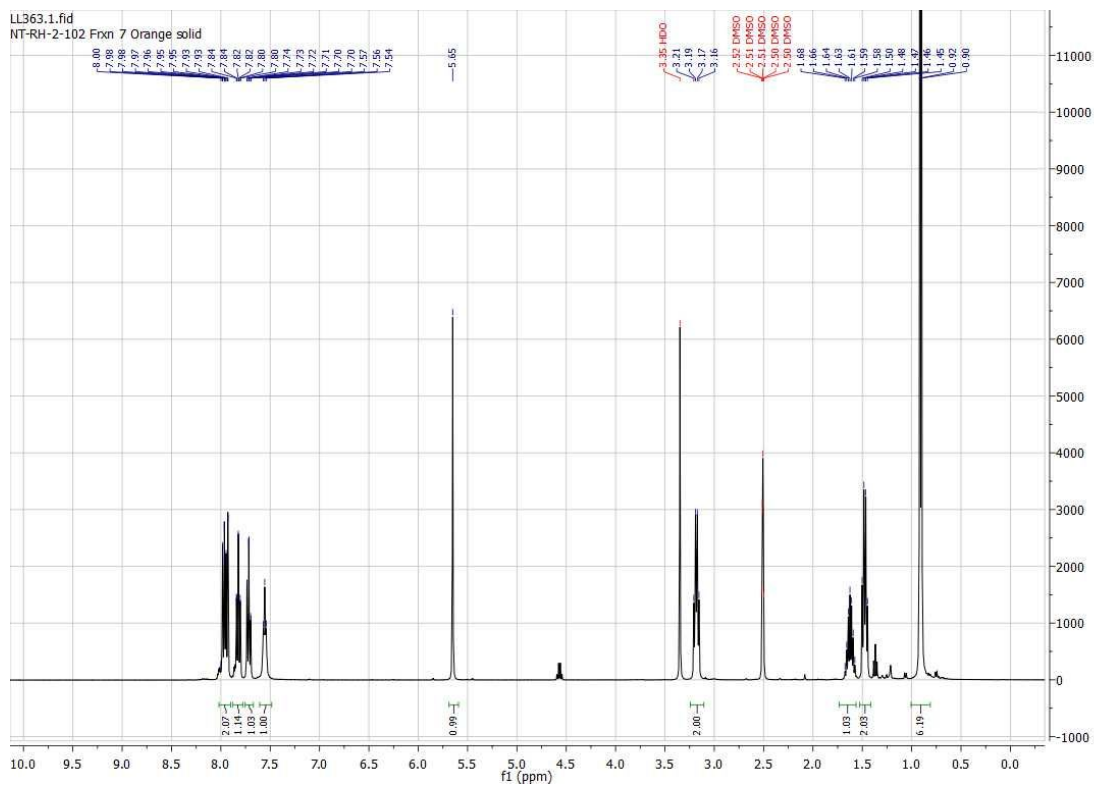

$^1\text{H}$  NMR of 3d

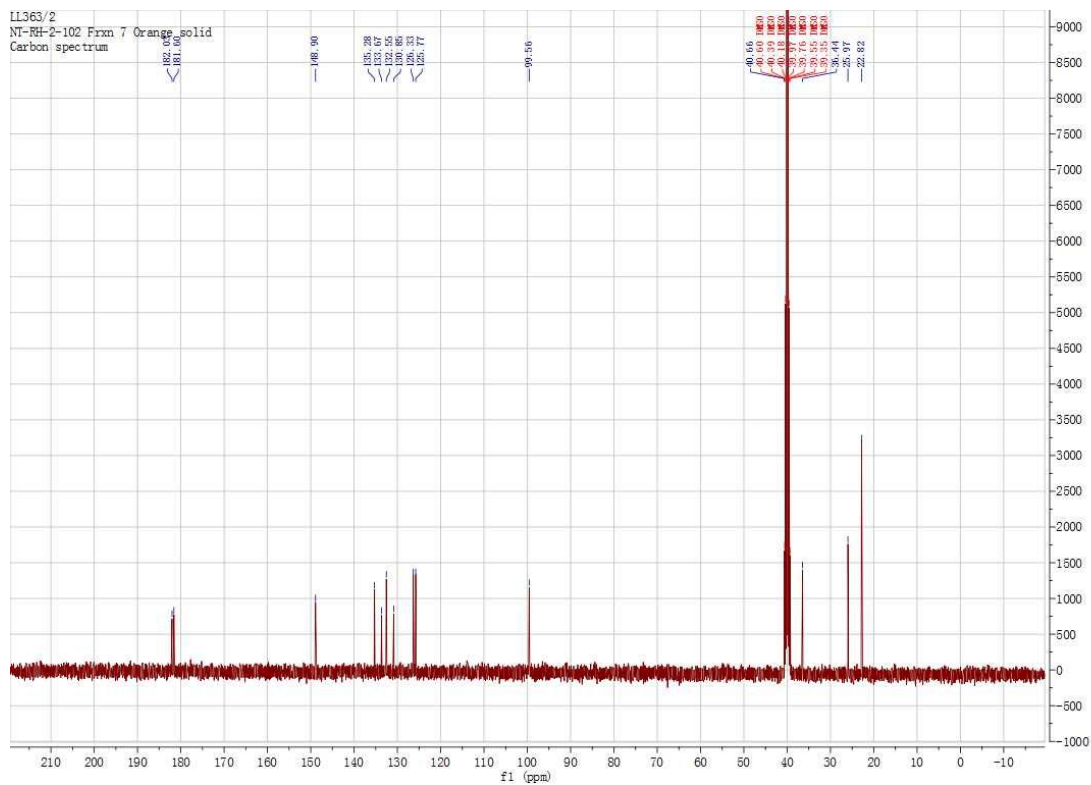

$^{13}\text{C}$  NMR of 3d

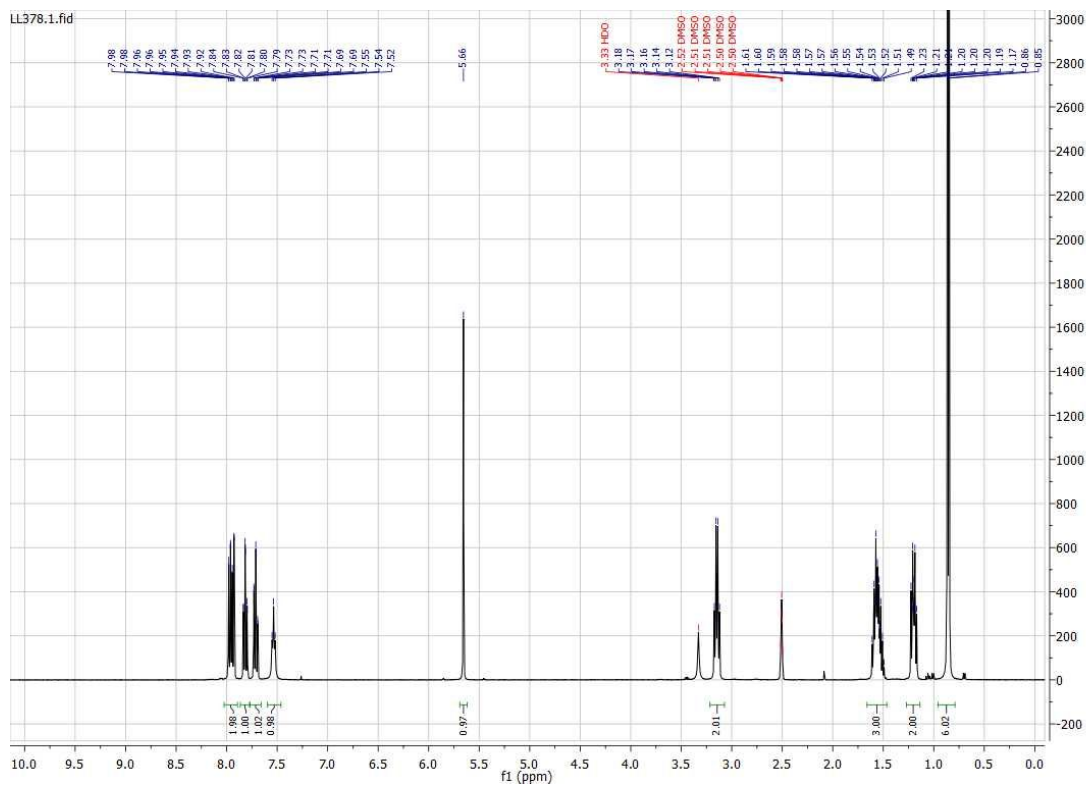

$^1\text{H}$  NMR of 3e

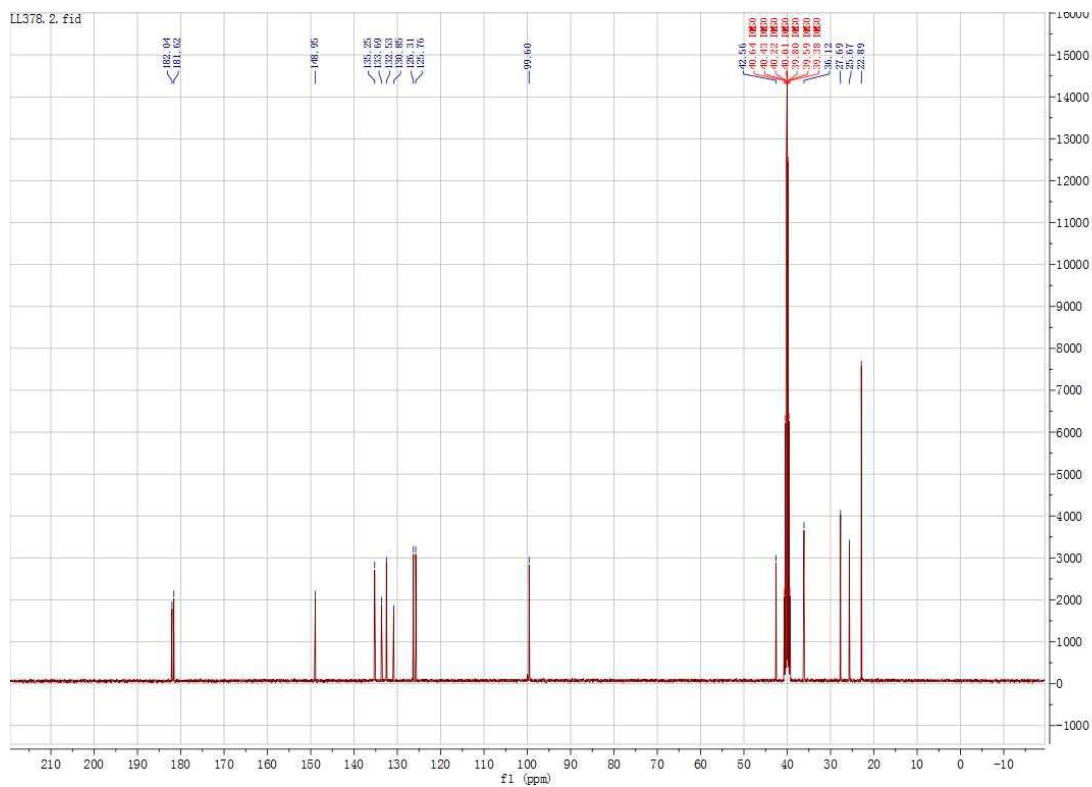

$^{13}\text{C}$  NMR of 3e

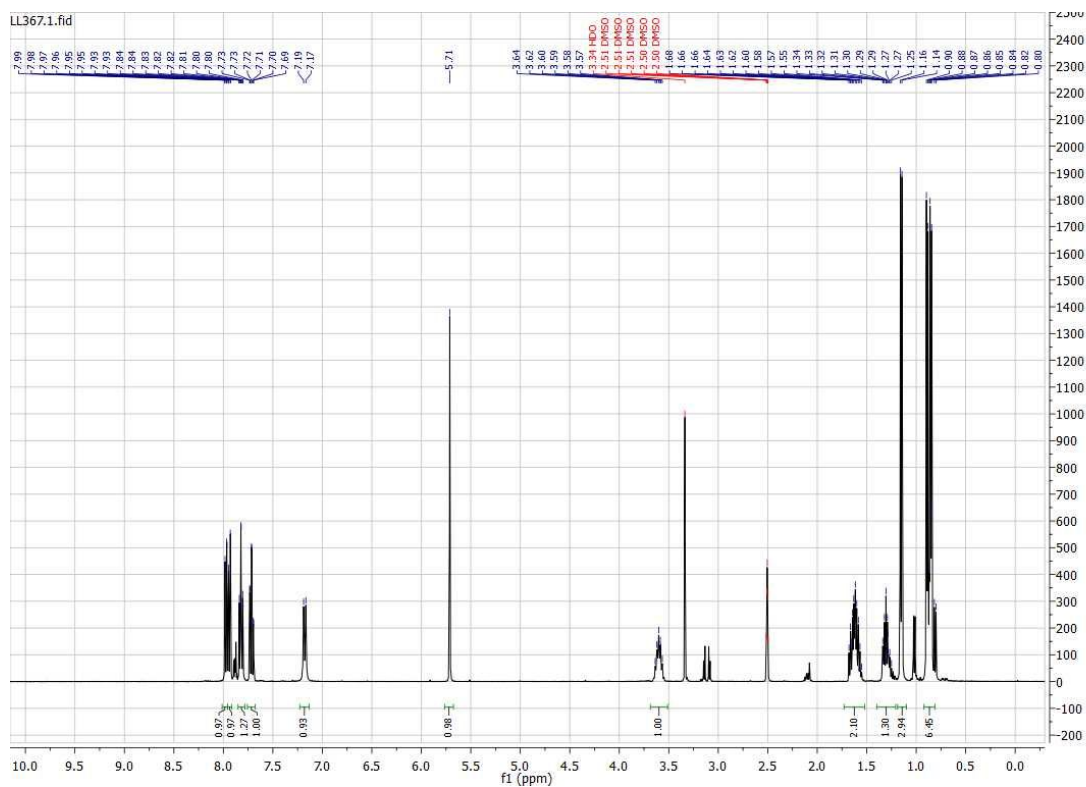

$^1\text{H}$  NMR of 3f

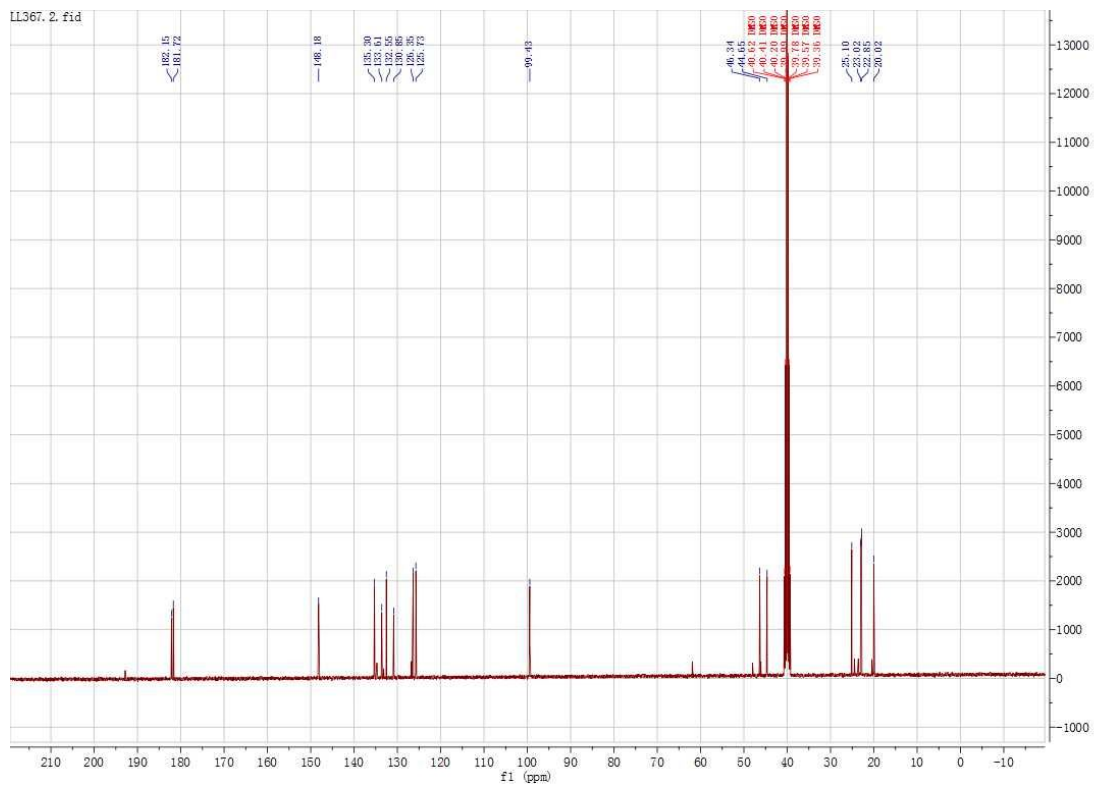

<sup>13</sup>C NMR of 3f

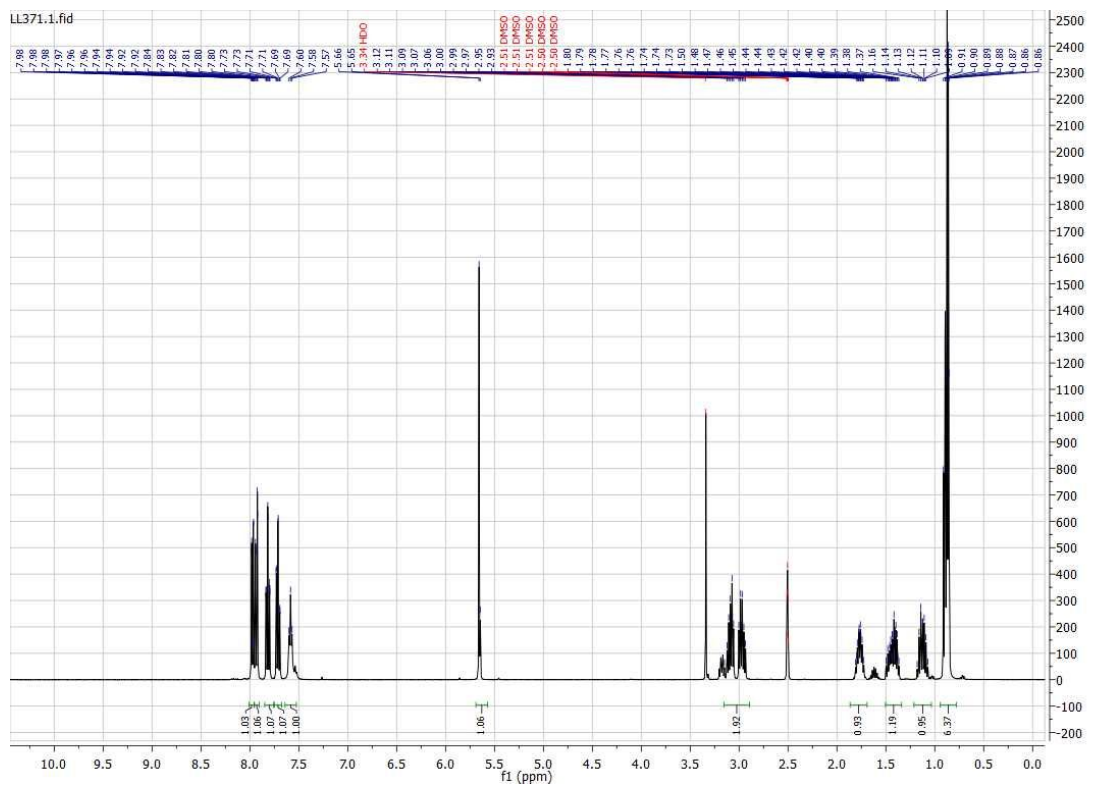

<sup>1</sup>H NMR of 3g

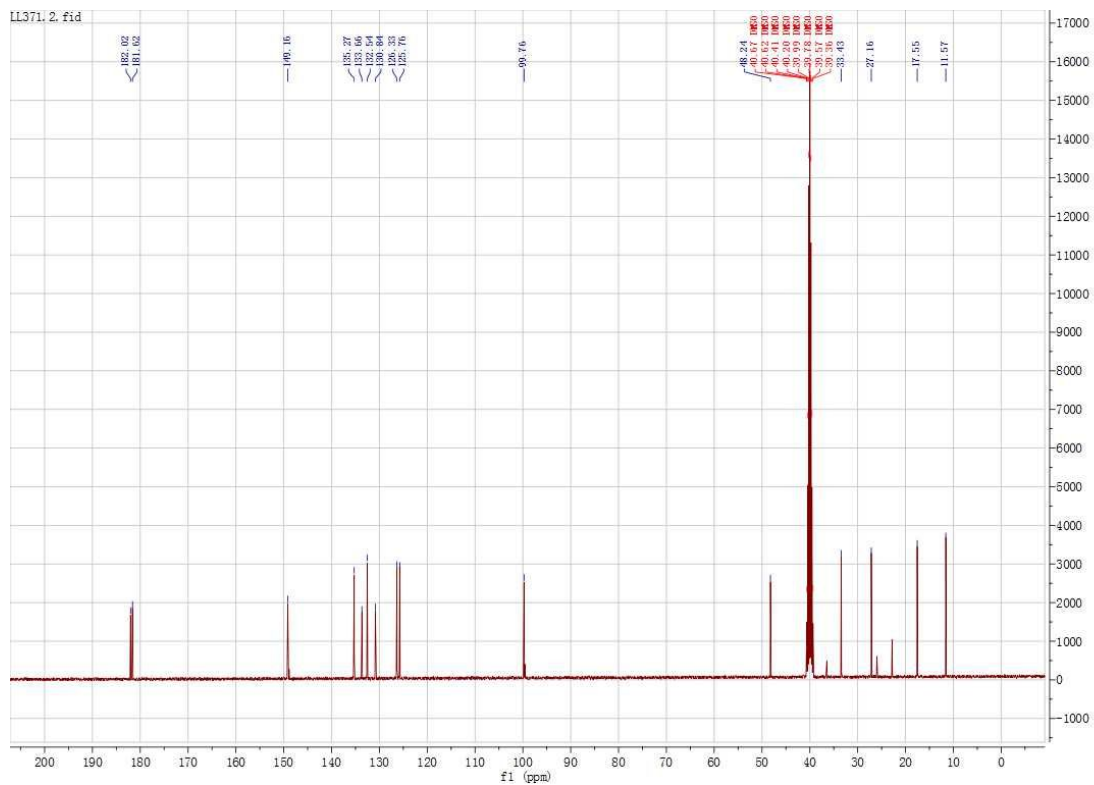

$^{13}\text{C}$  NMR of 3g

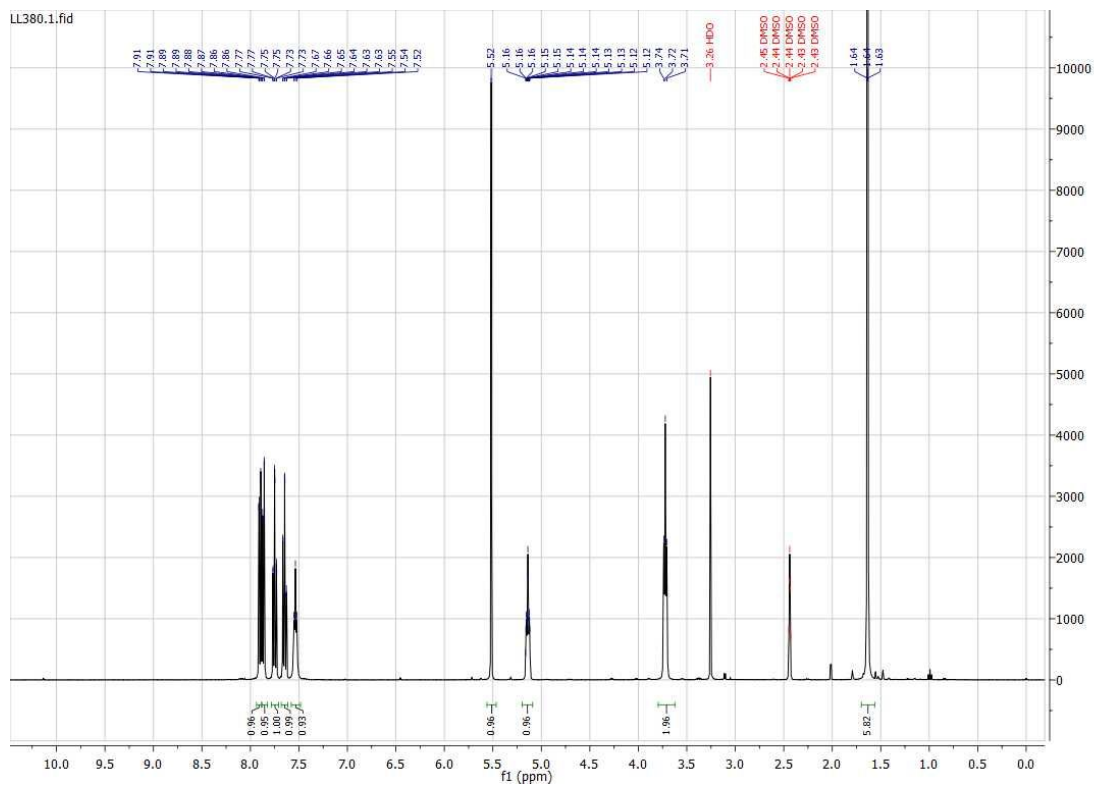

$^1\text{H}$  NMR of 3h

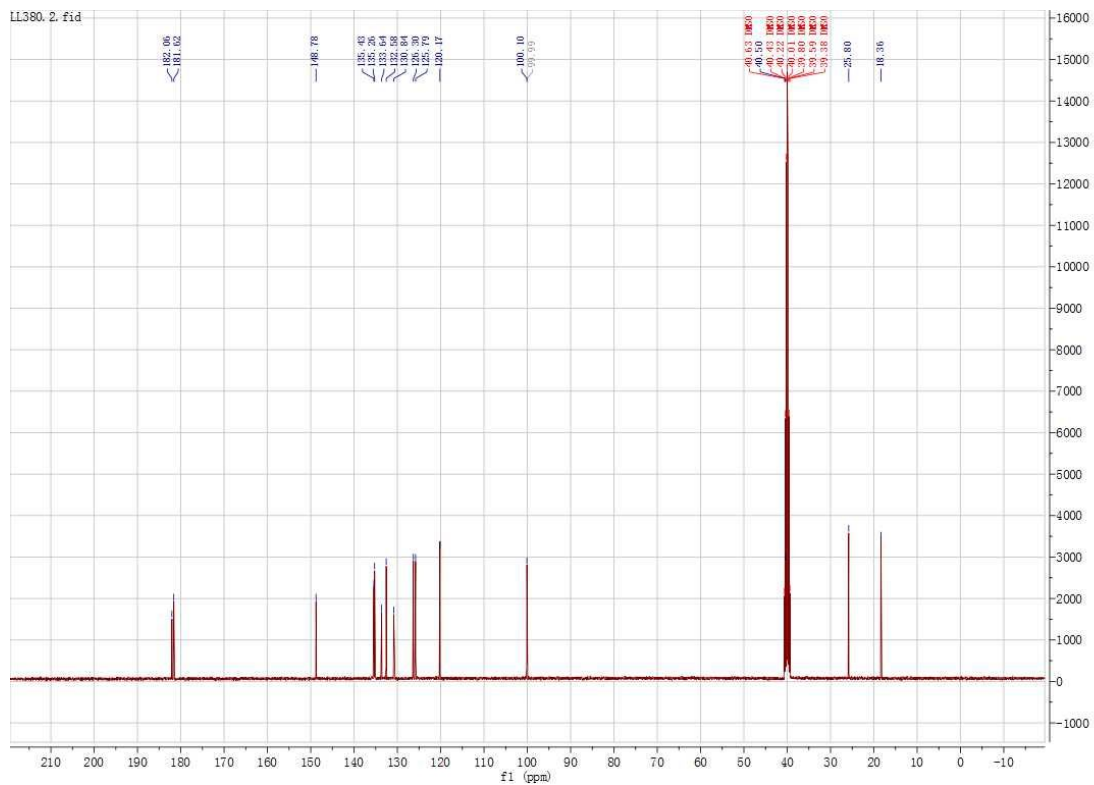

$^{13}\text{C}$  NMR of 3h

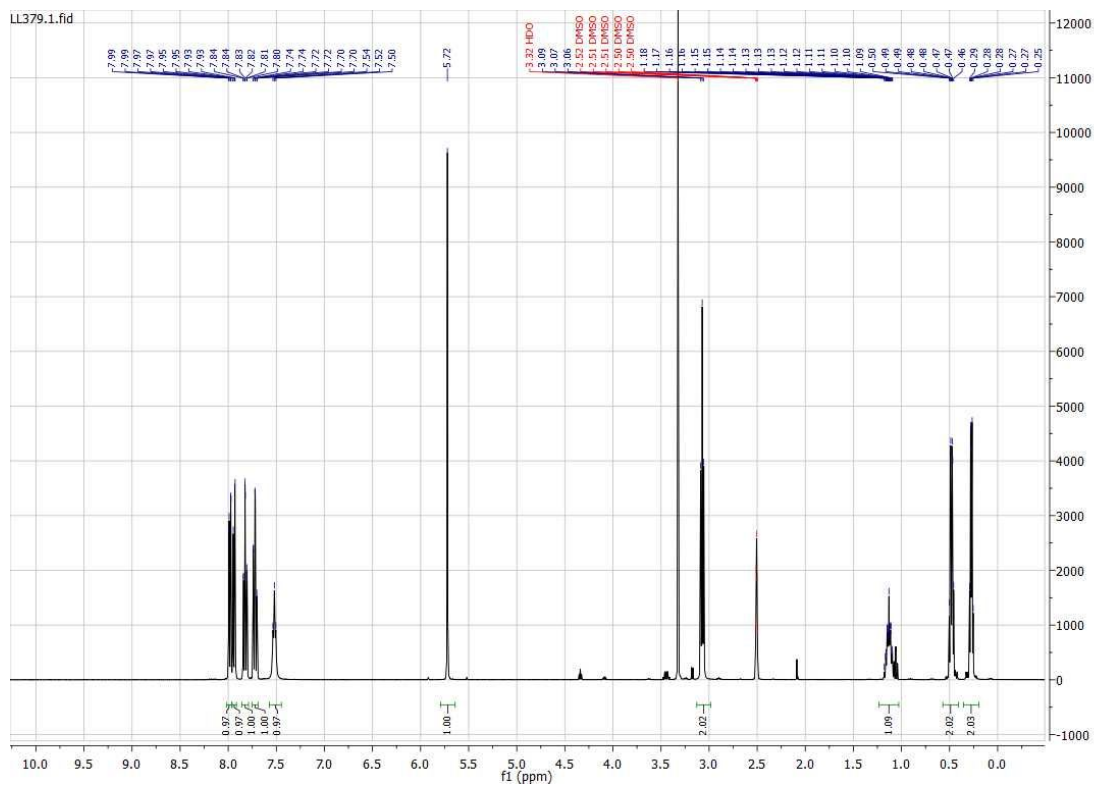

$^1\text{H}$  NMR of 3i

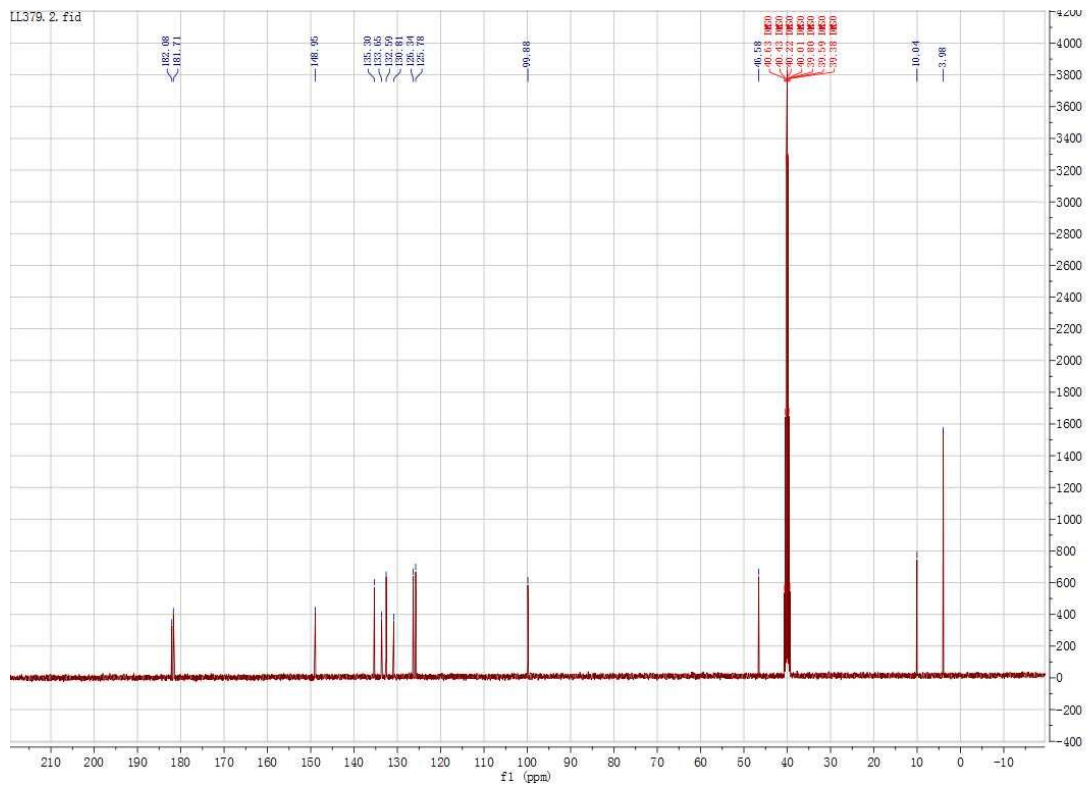

$^{13}\text{C}$  NMR of 3i

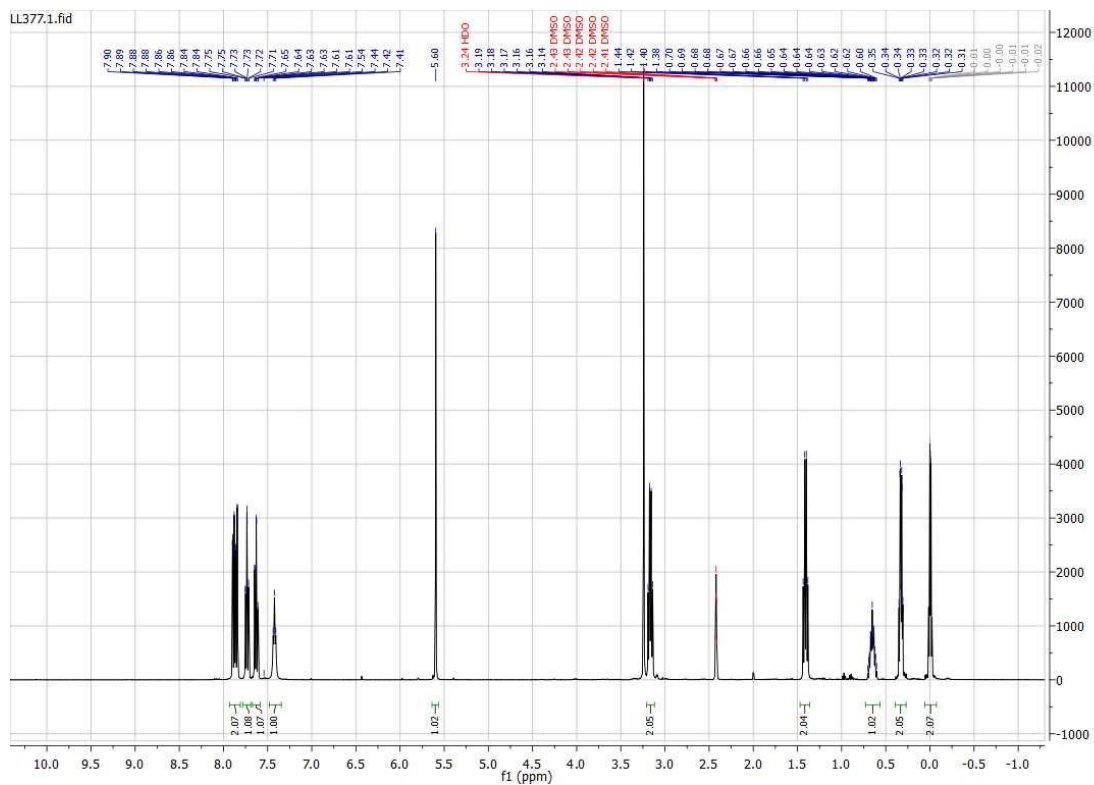

$^1\text{H}$  NMR of 3j

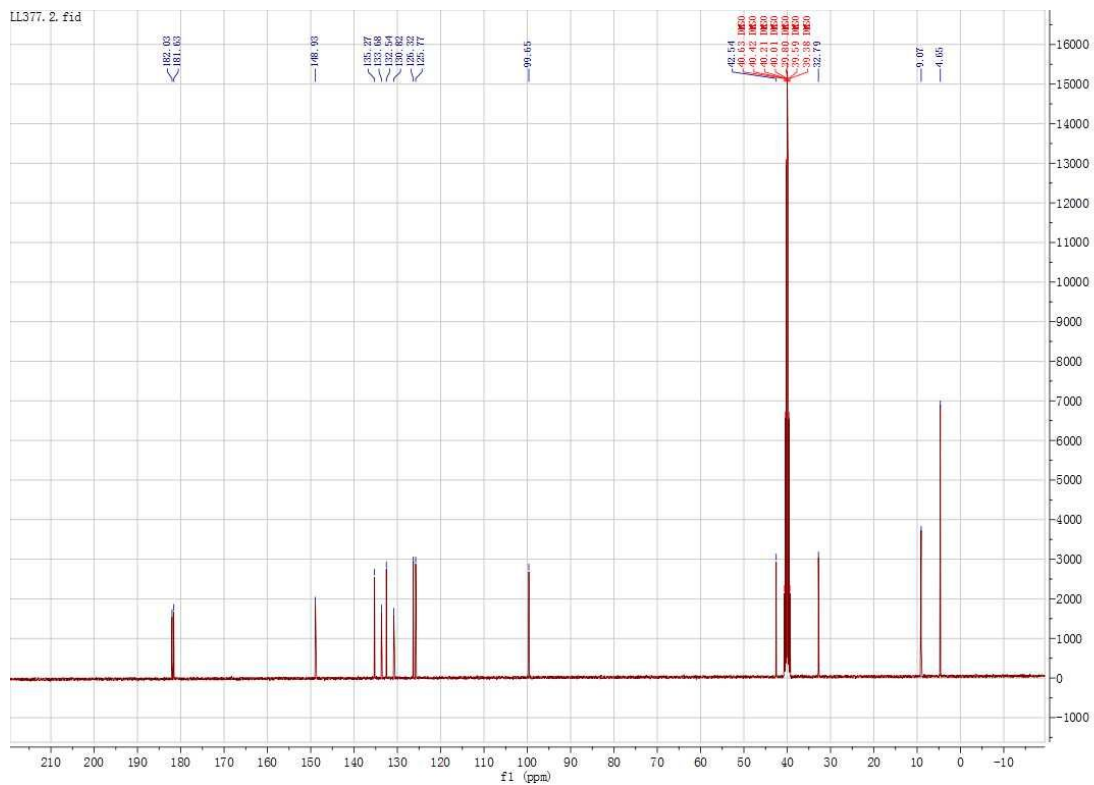

$^{13}\text{C}$  NMR of 3j

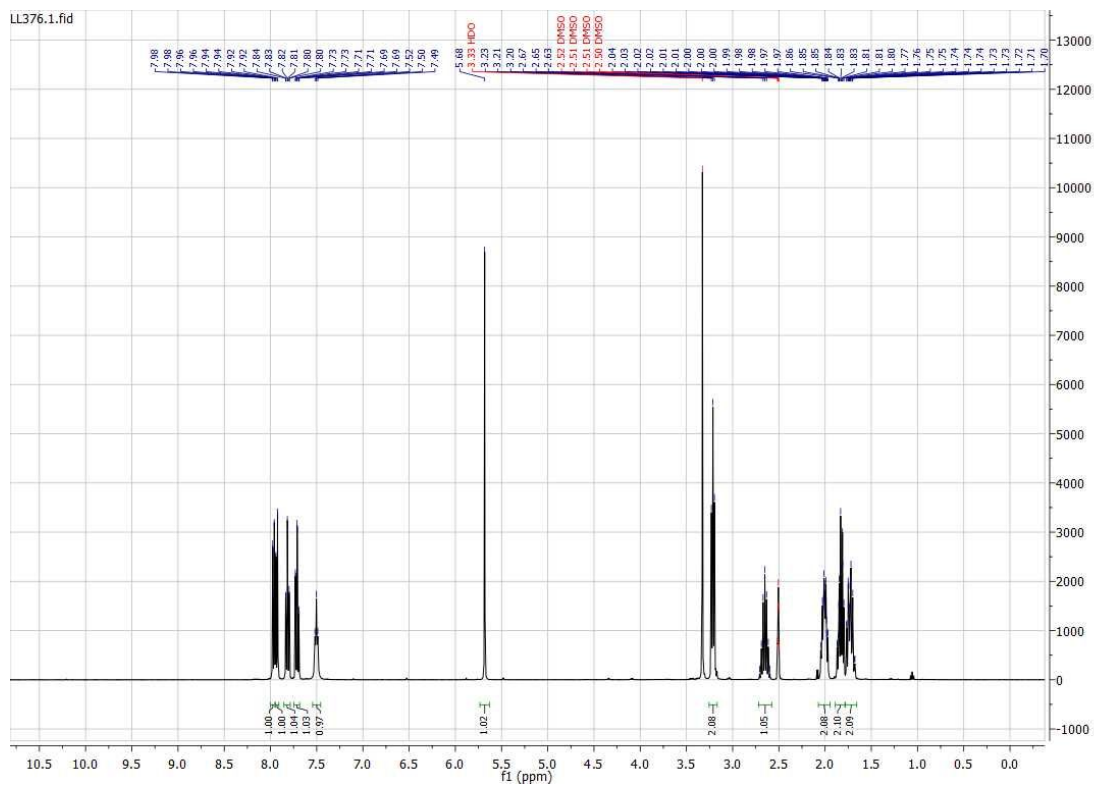

$^1\text{H}$  NMR of 3k



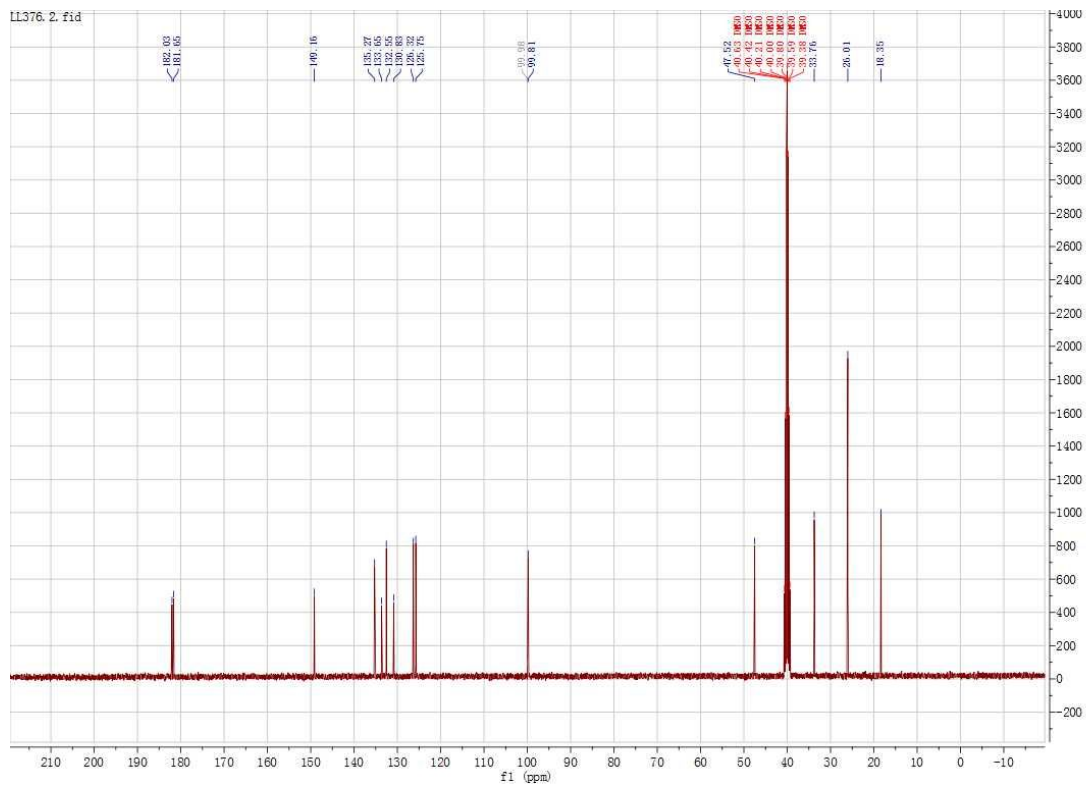

$^{13}\text{C}$  NMR of 3k

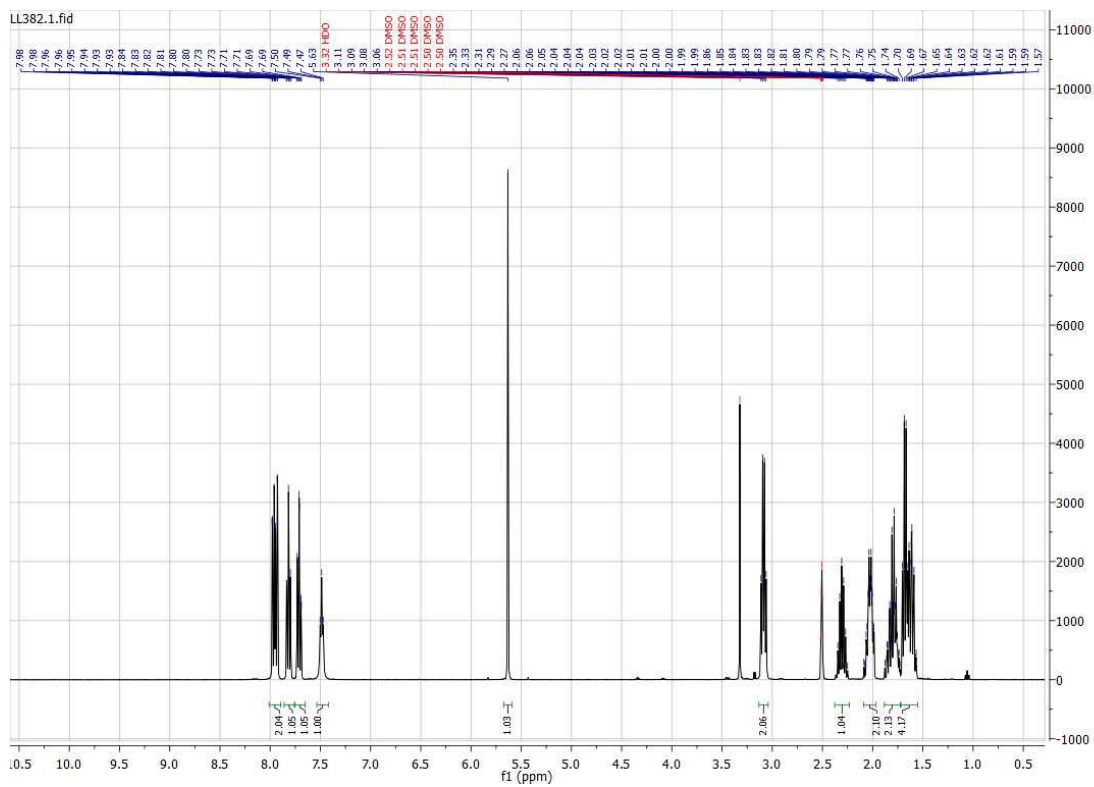

$^1\text{H}$  NMR of 3l

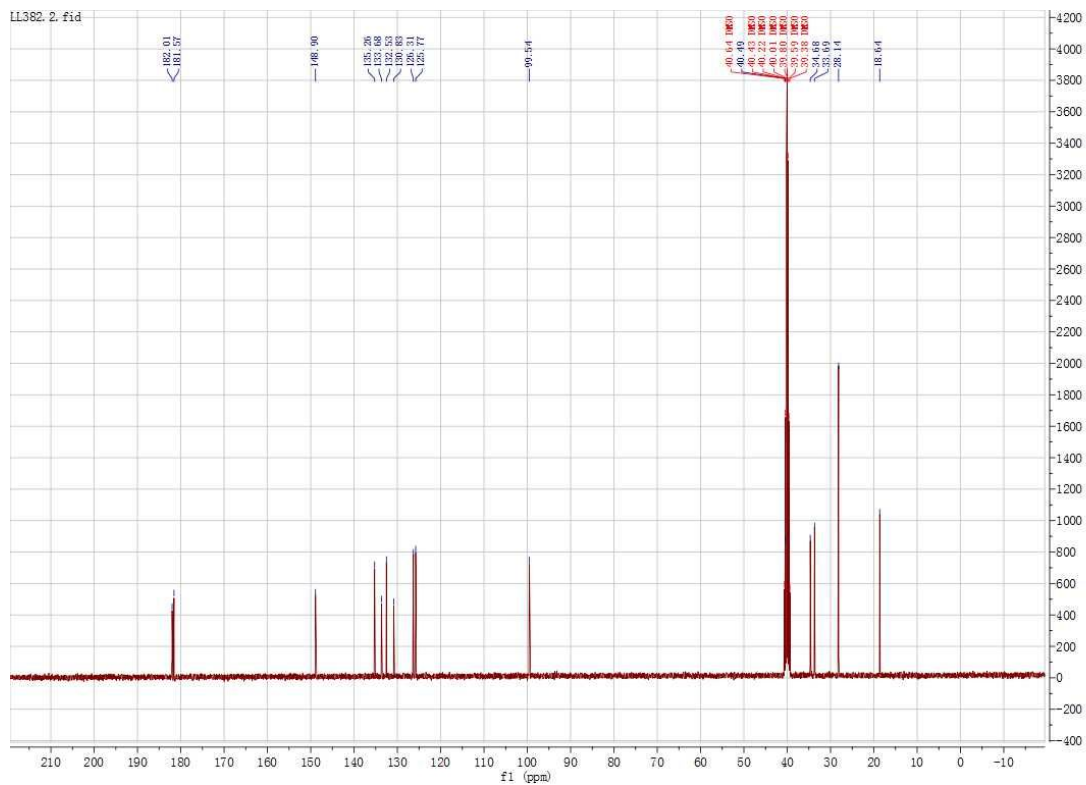

<sup>13</sup>C NMR of 3l

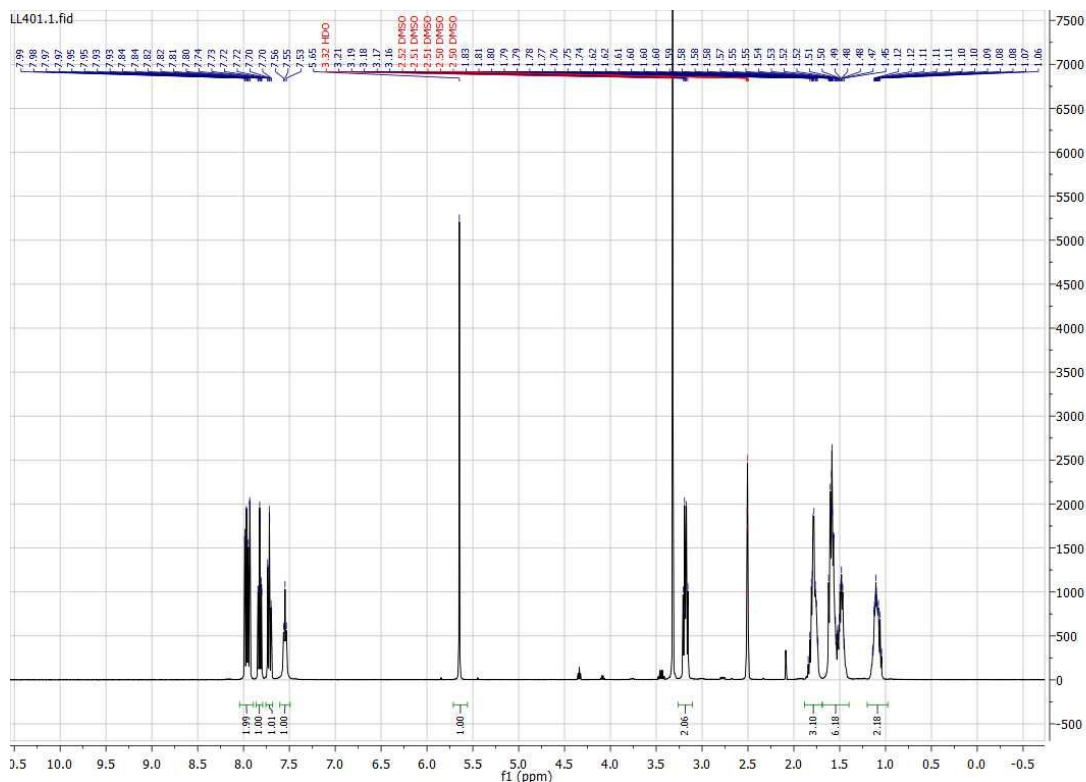

<sup>1</sup>H NMR of 3m

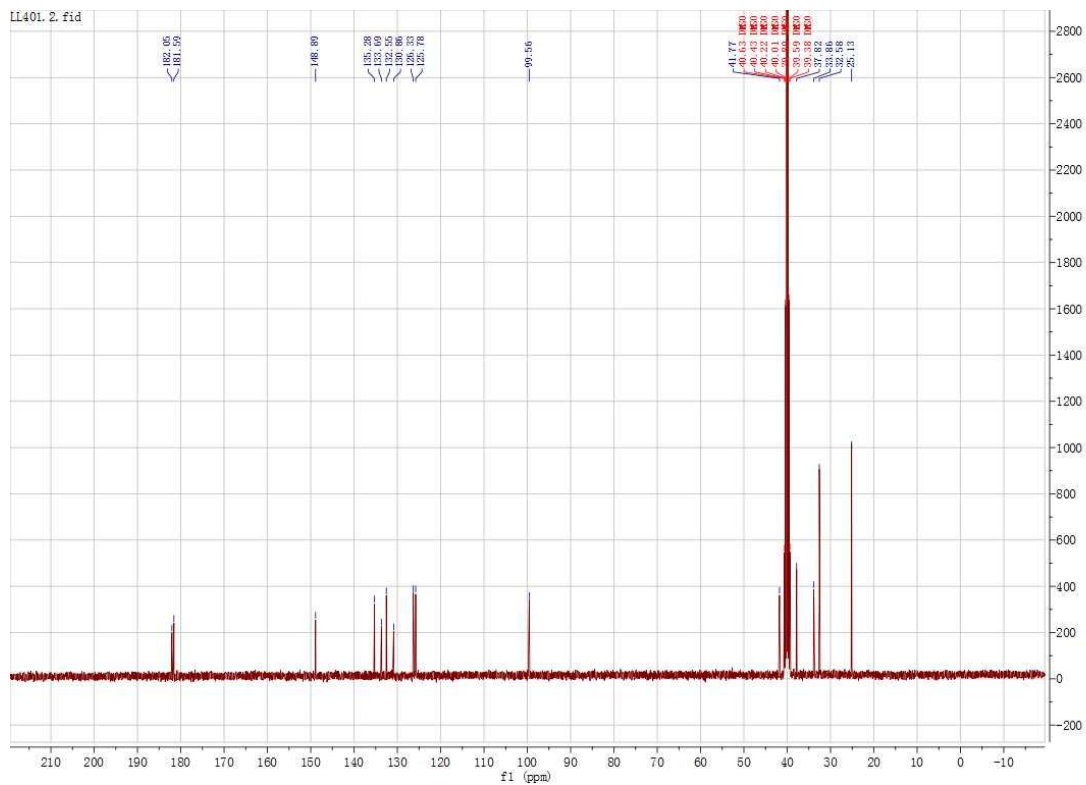

<sup>13</sup>C NMR of 3m

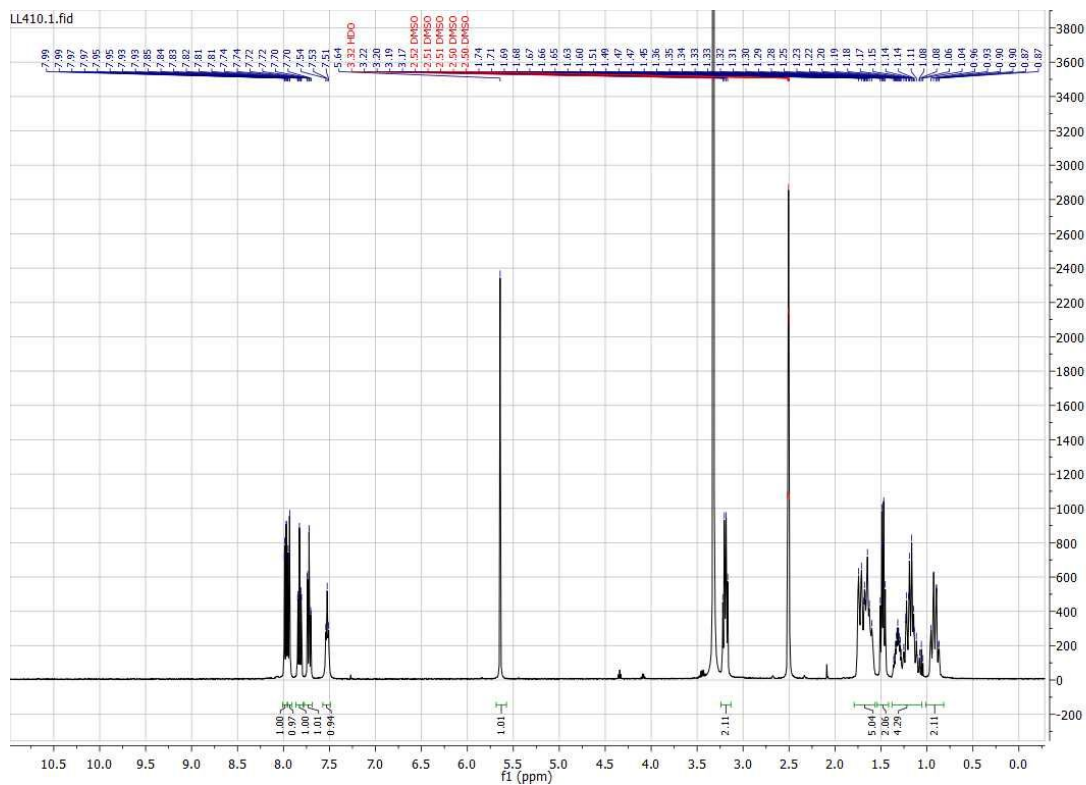

<sup>1</sup>H NMR of 3n

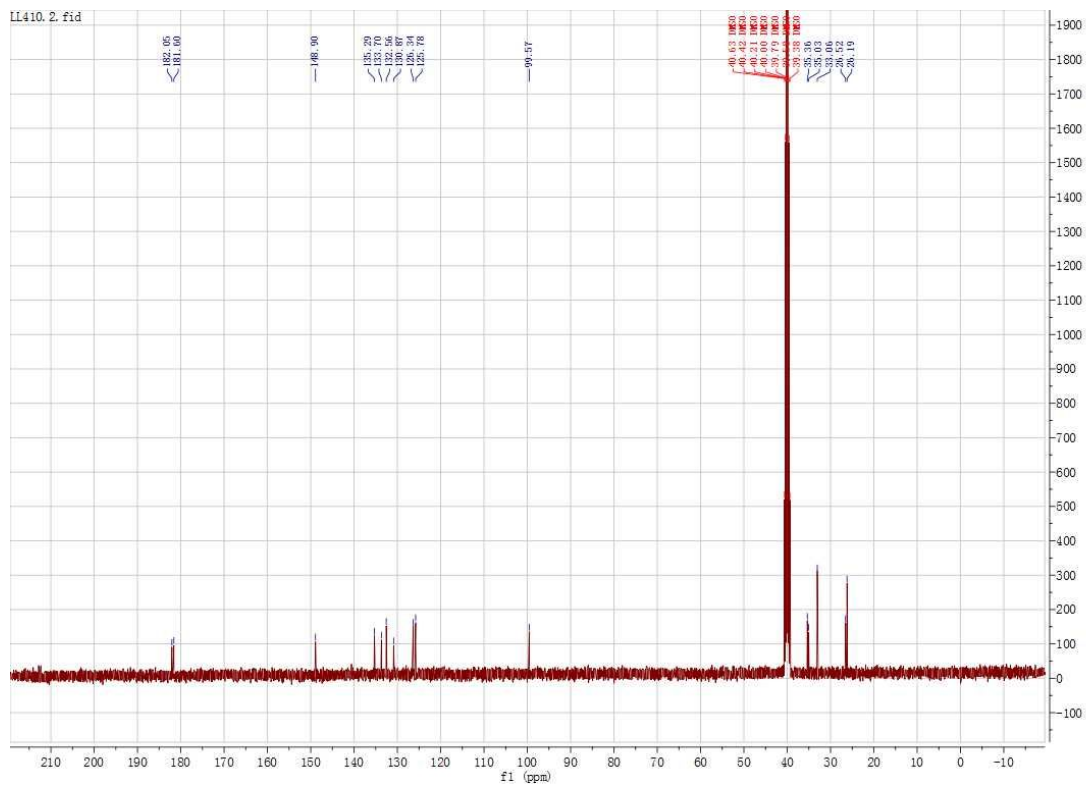

<sup>13</sup>C NMR of 3n

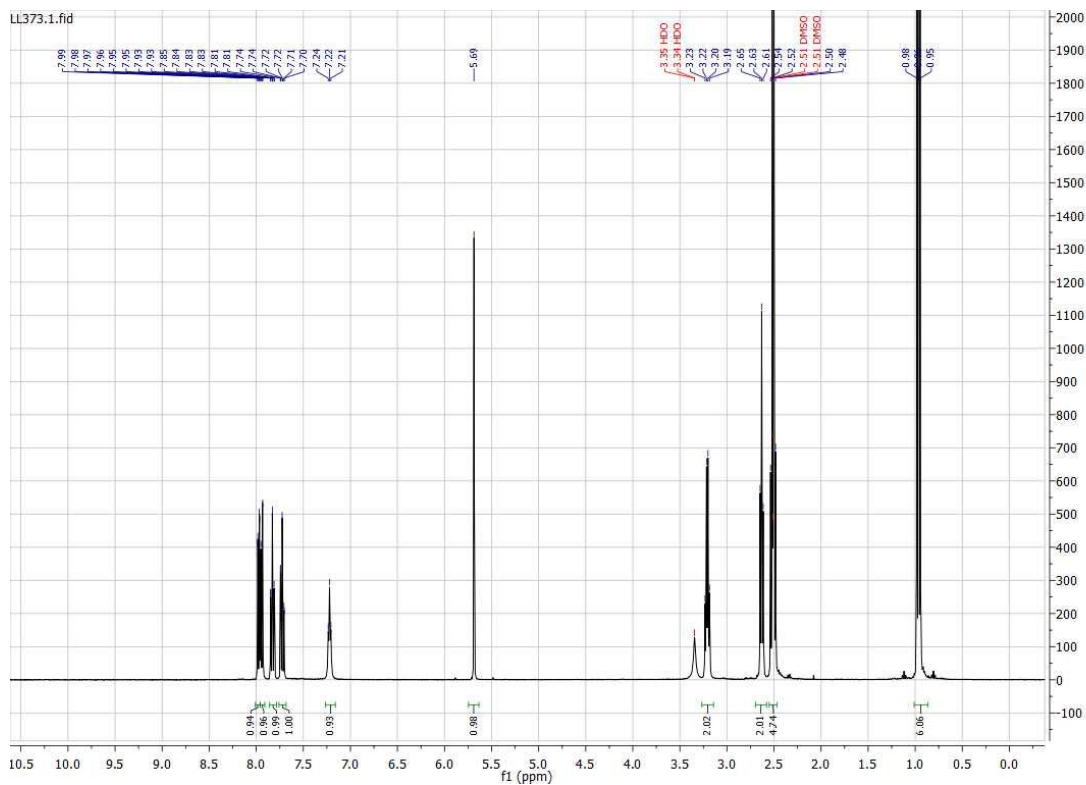

<sup>1</sup>H NMR of 3o



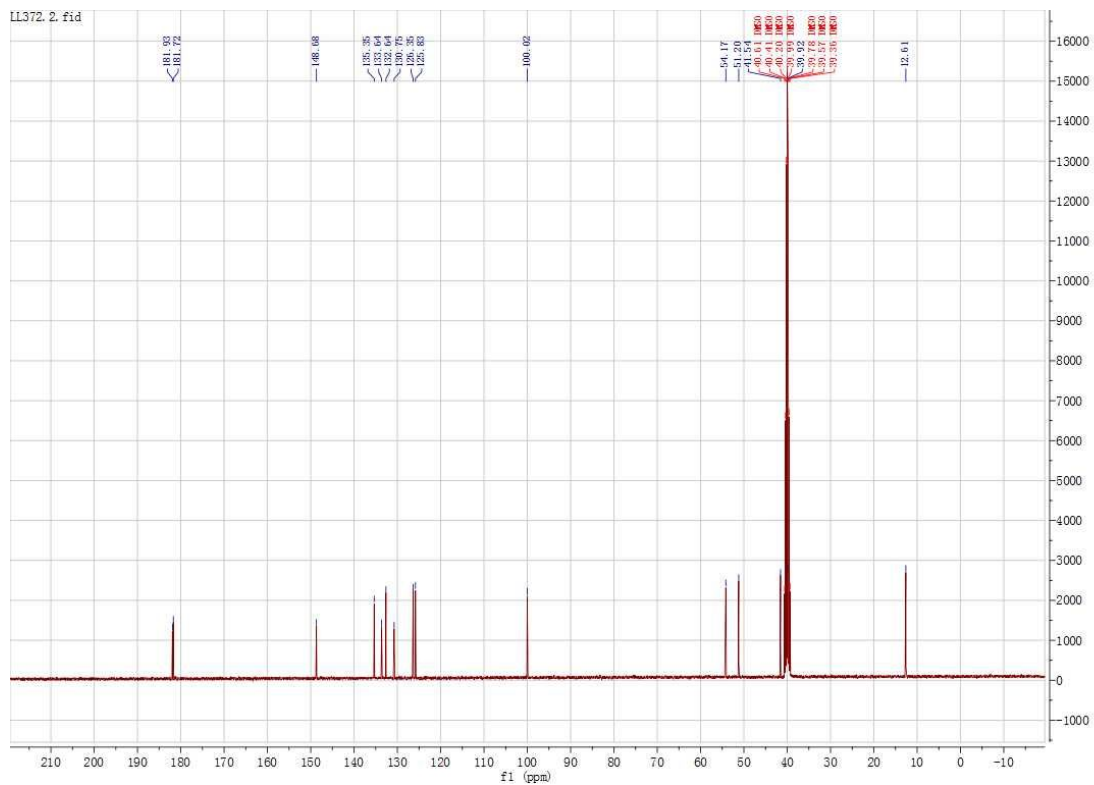

$^{13}\text{C}$  NMR of 3p

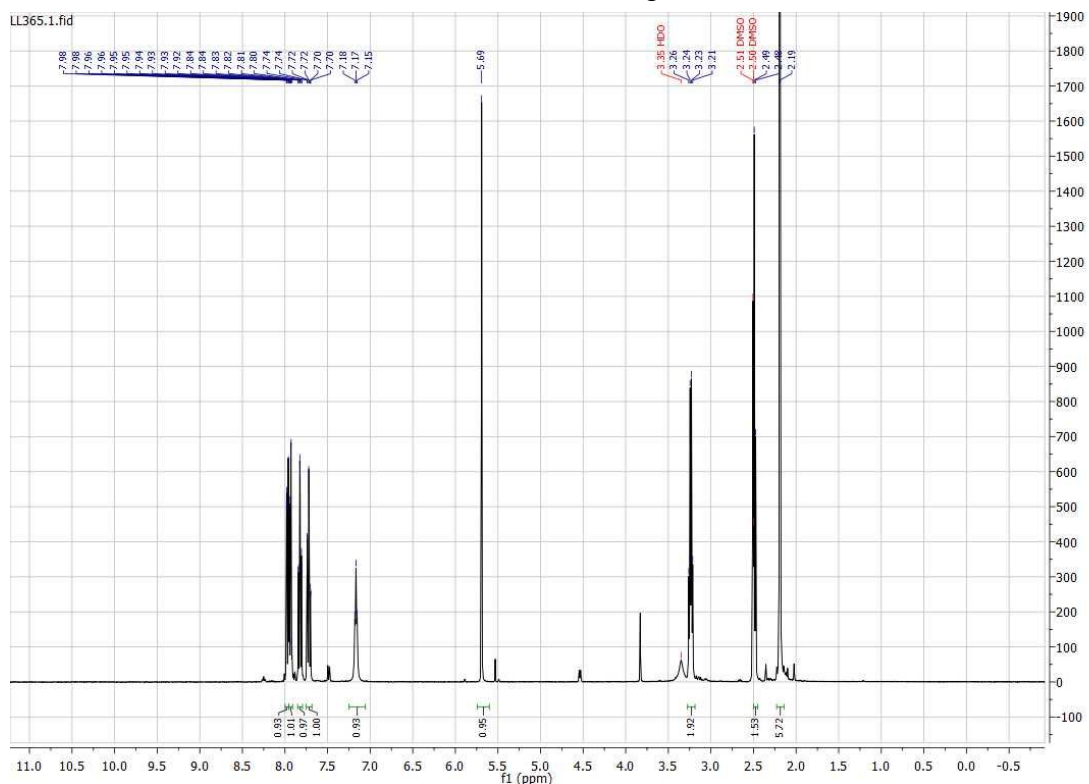

$^1\text{H}$  NMR of 3q

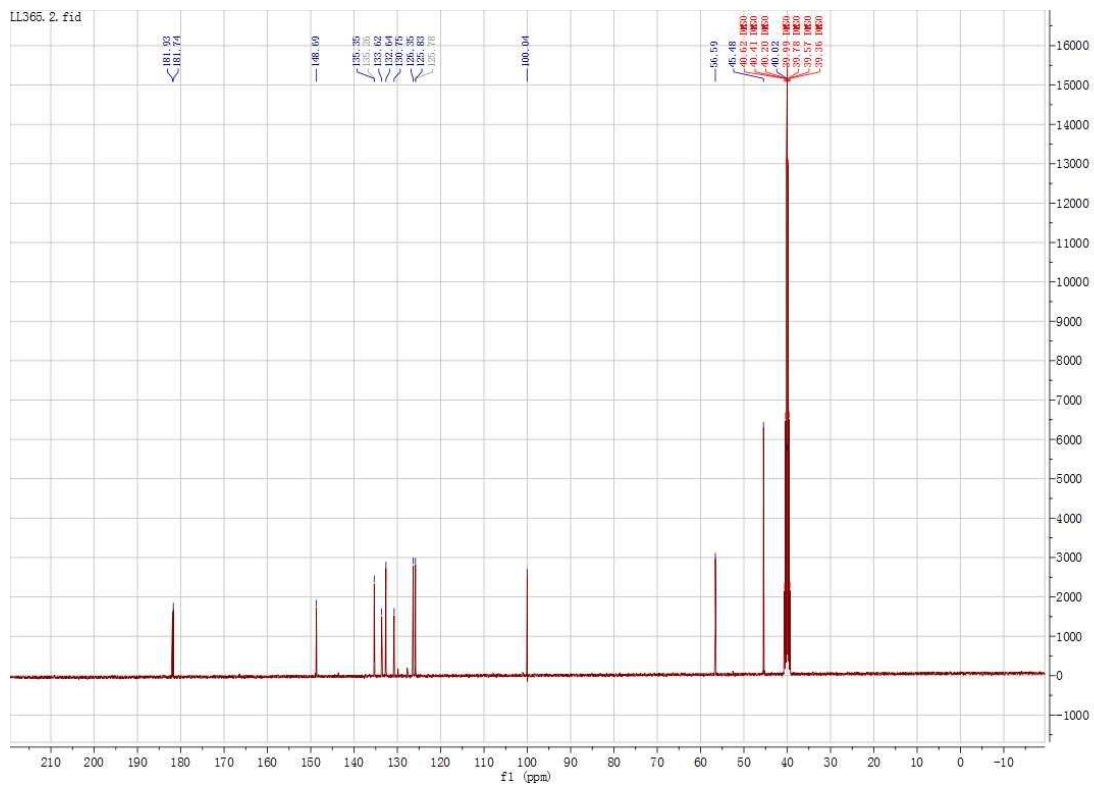

<sup>13</sup>C NMR of 3q

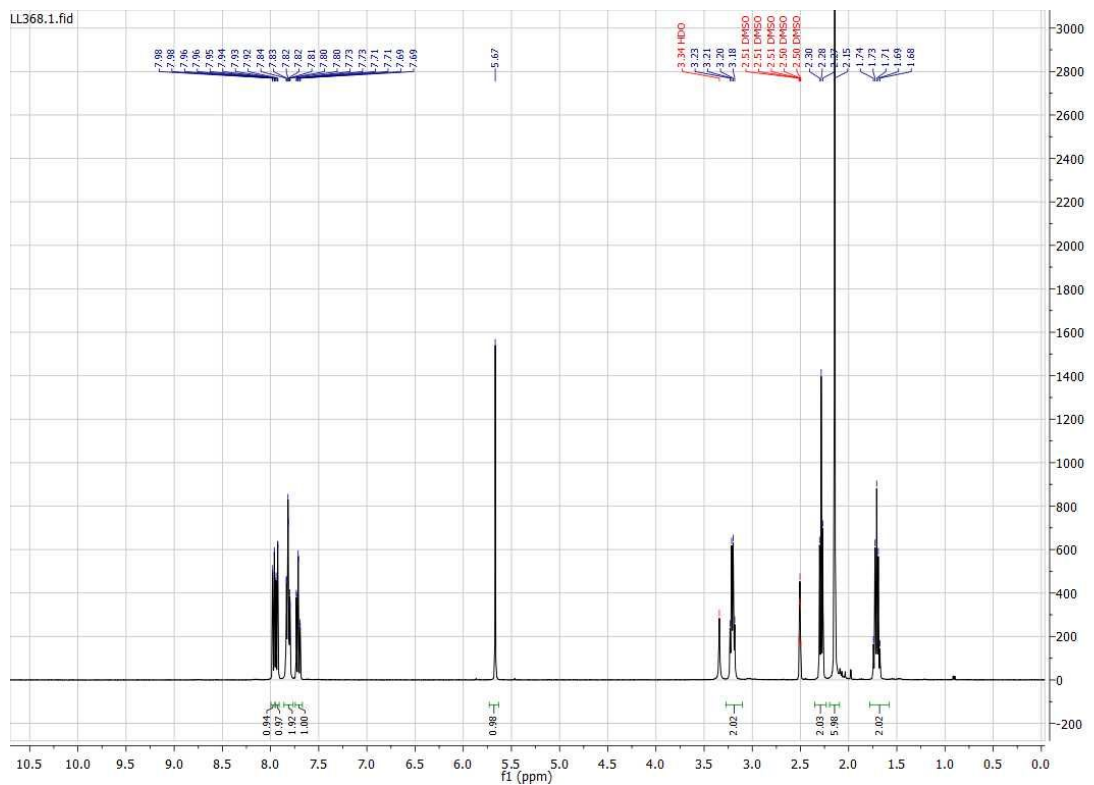

<sup>1</sup>H NMR of 3r

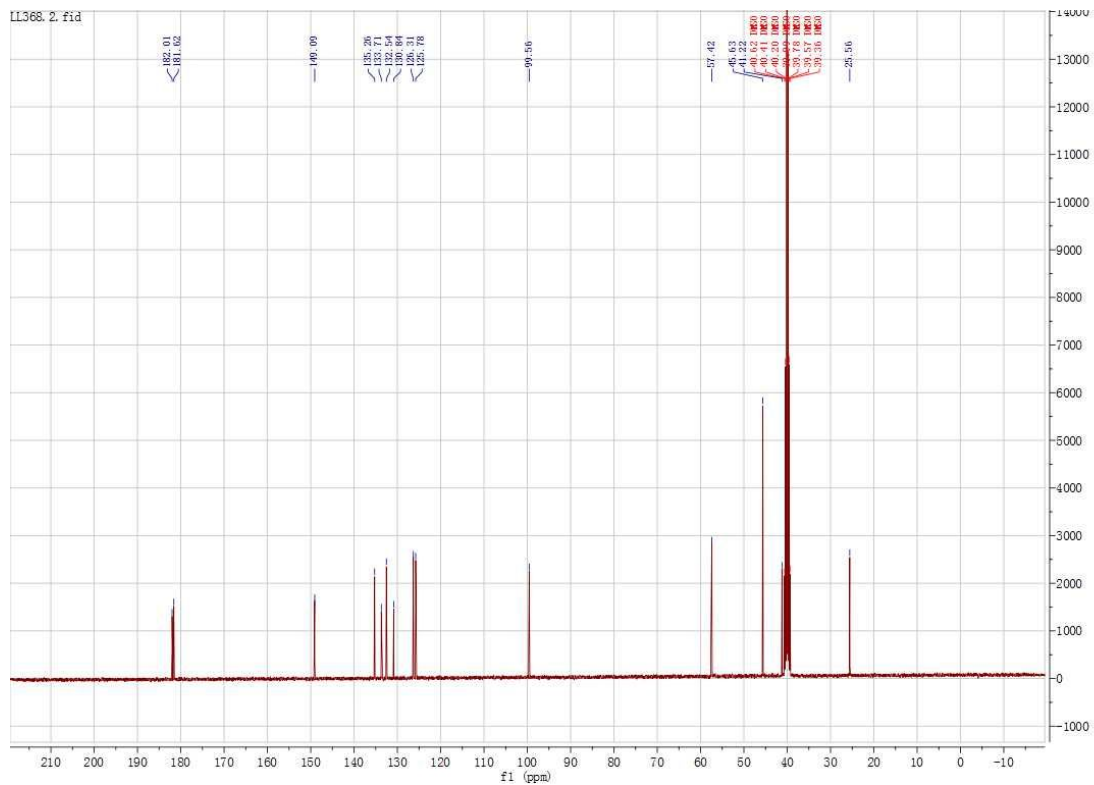

$^{13}\text{C}$  NMR of 3r

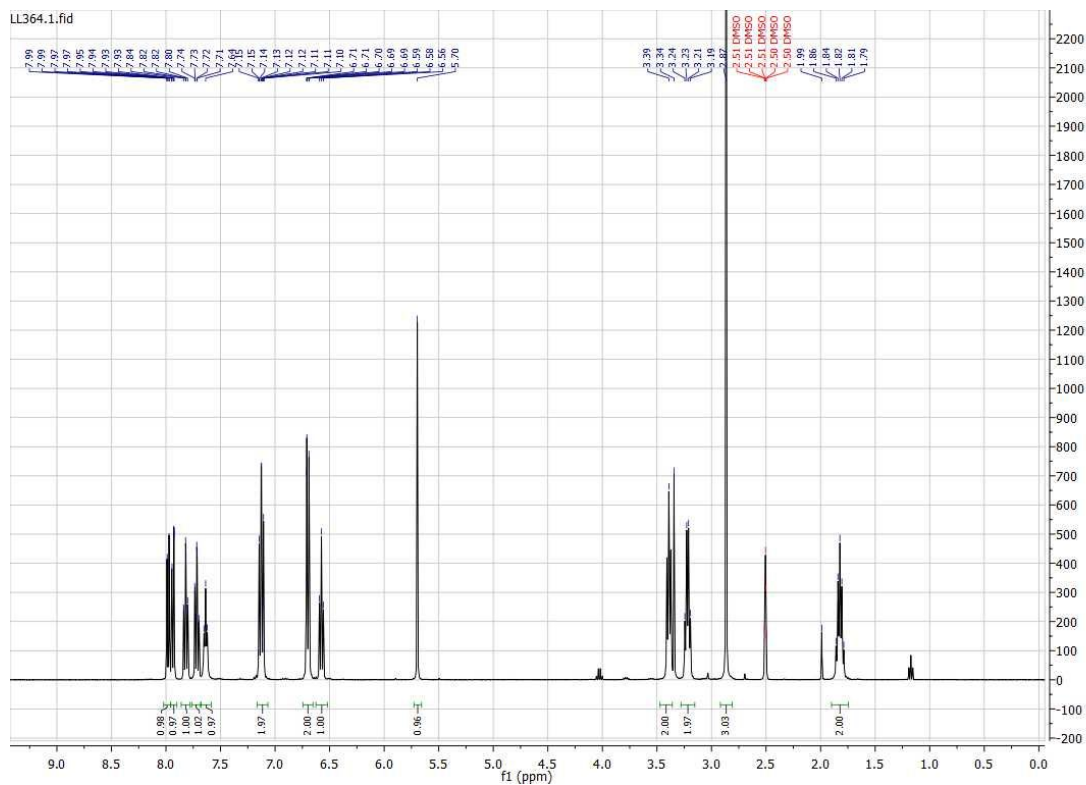

$^1\text{H}$  NMR of 3s



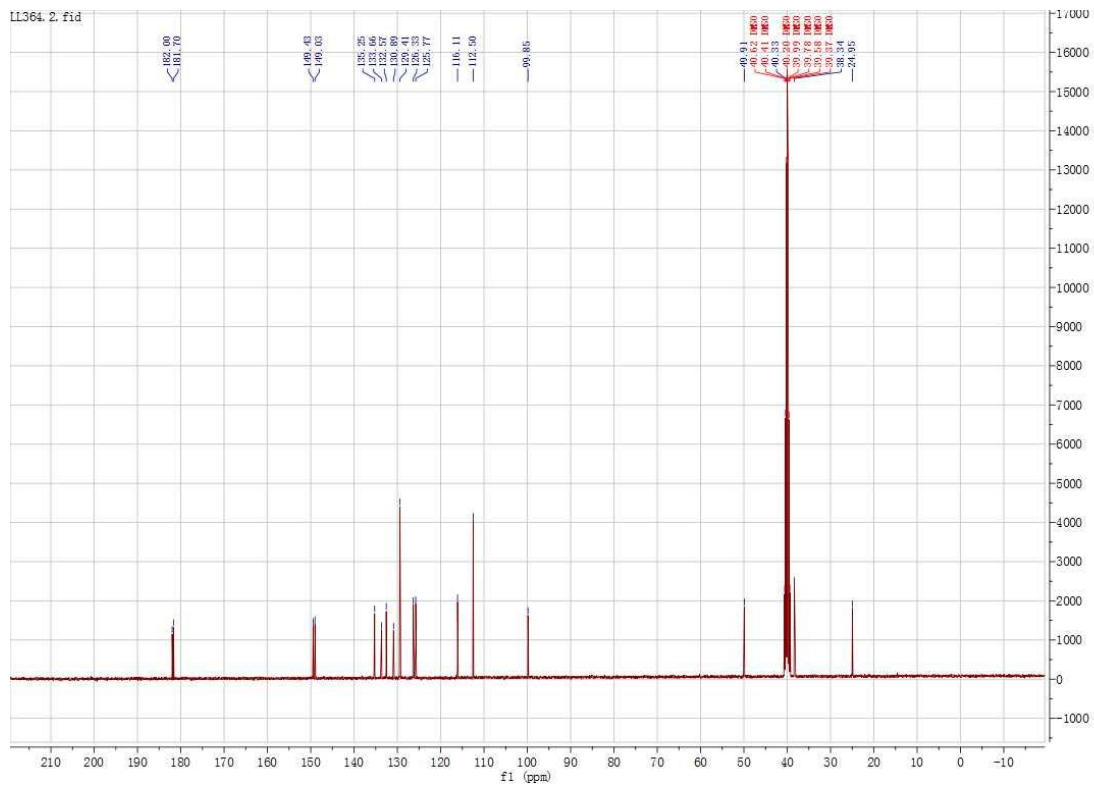

$^{13}\text{C}$  NMR of 3s

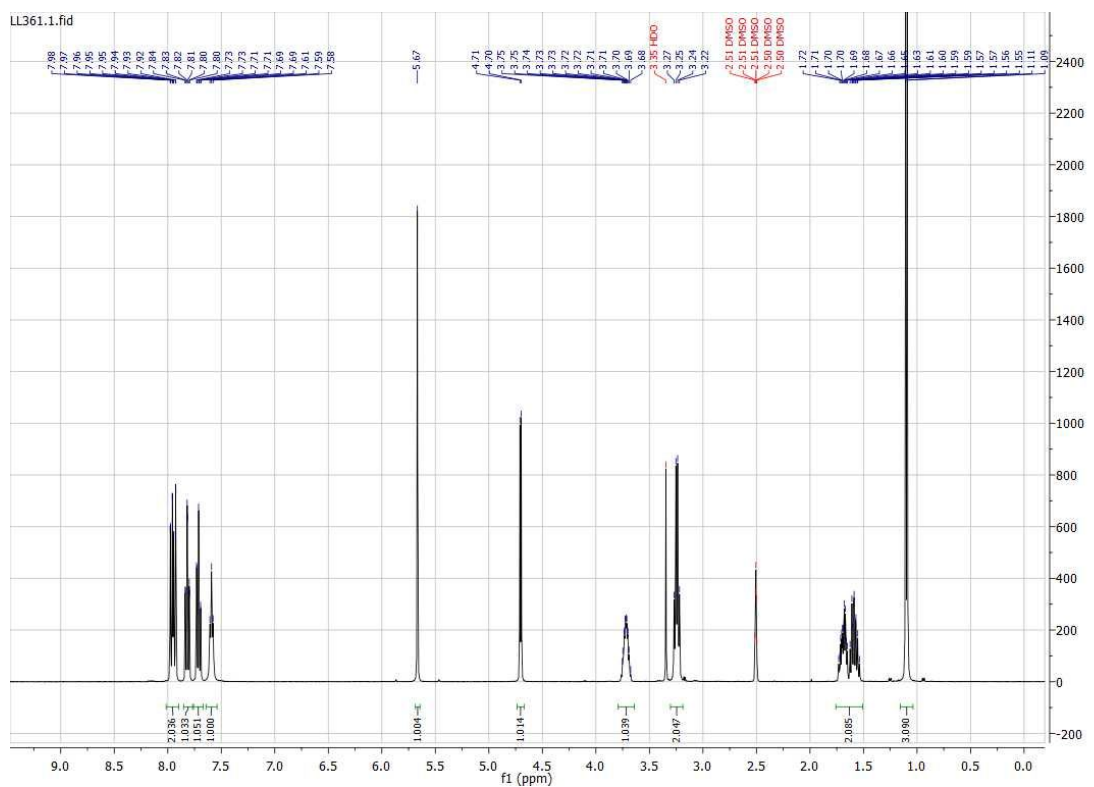

$^1\text{H}$  NMR of 3t

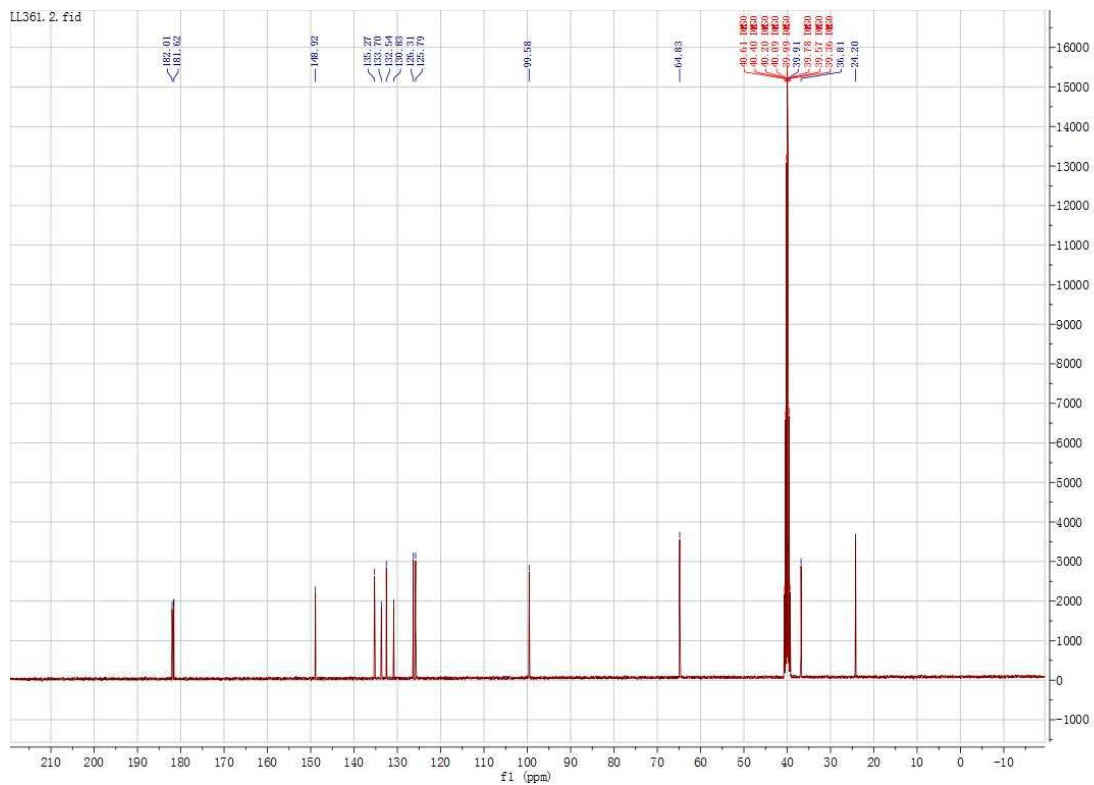

$^{13}\text{C}$  NMR of 3t

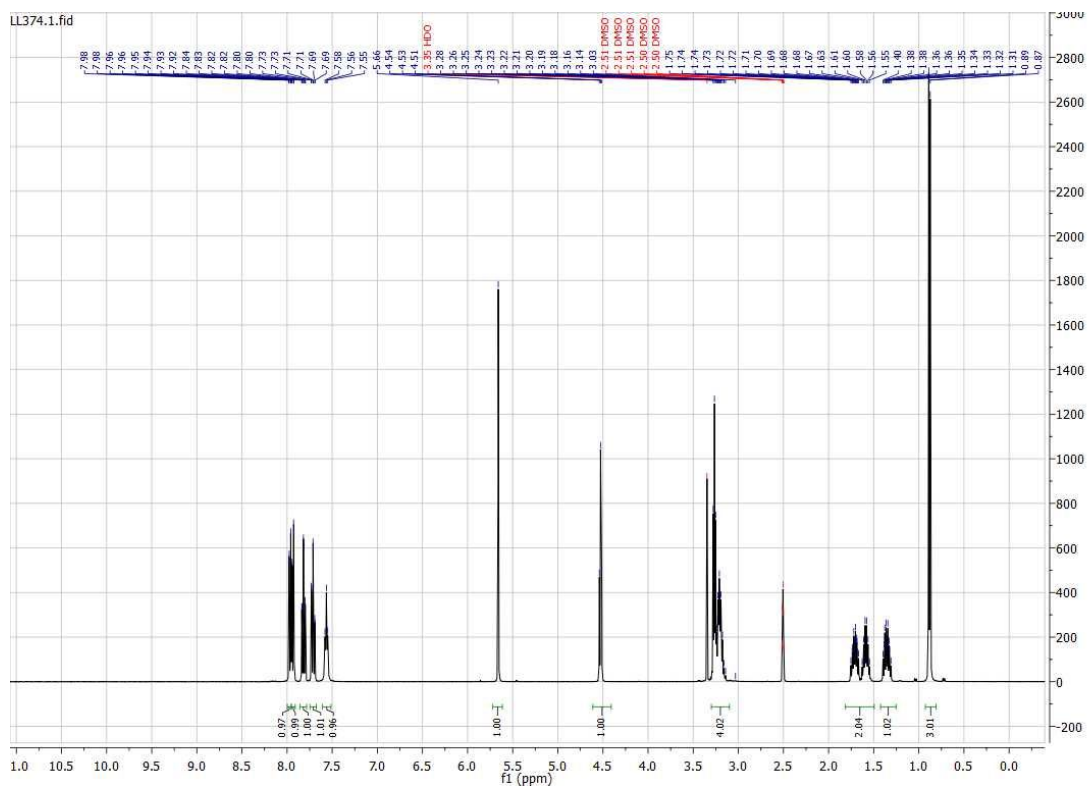

$^1\text{H}$  NMR of 3u

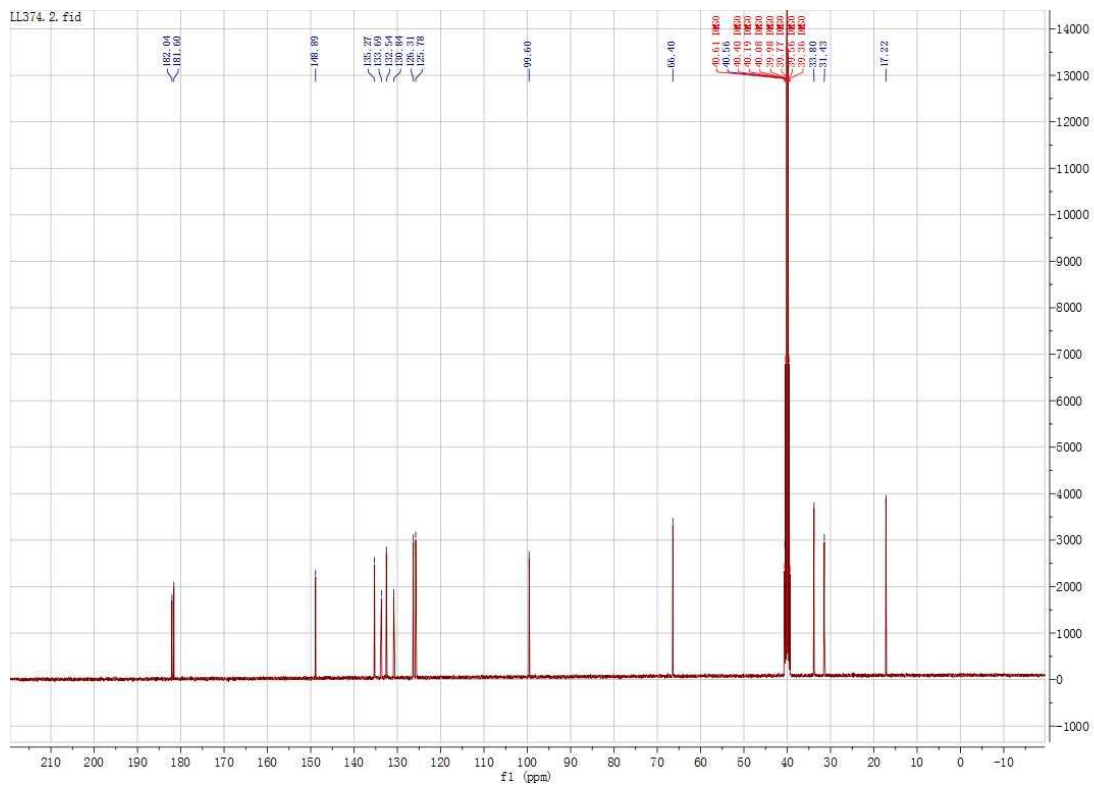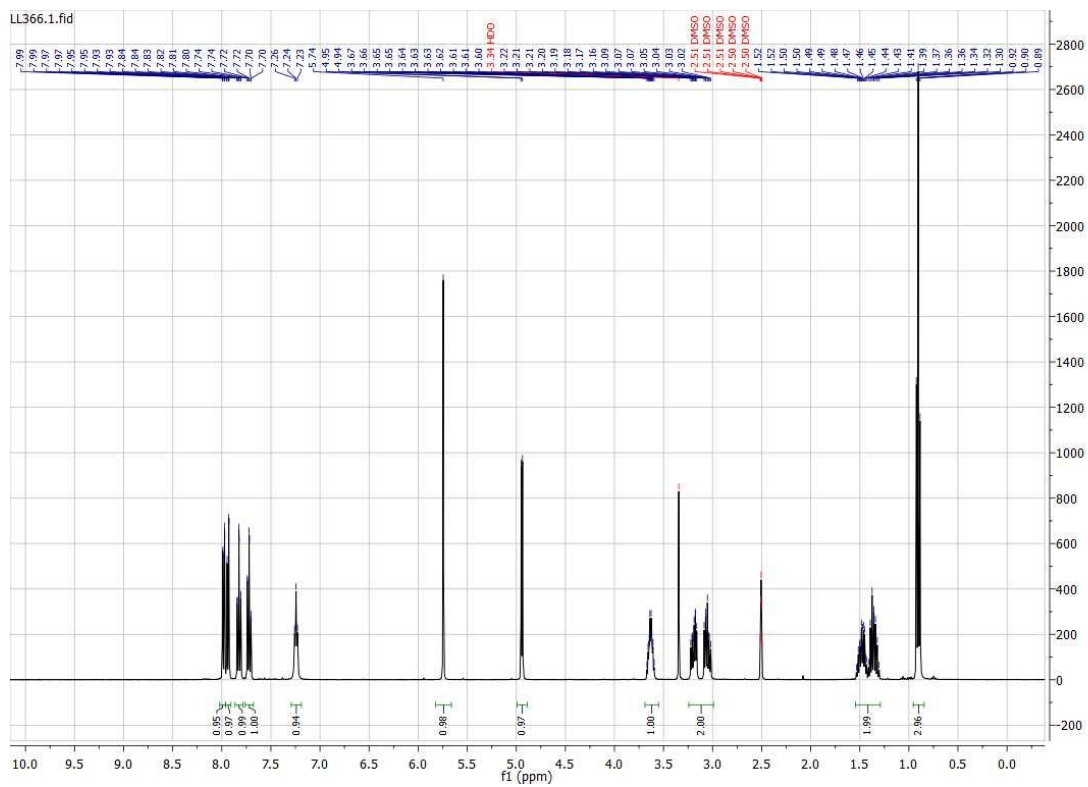

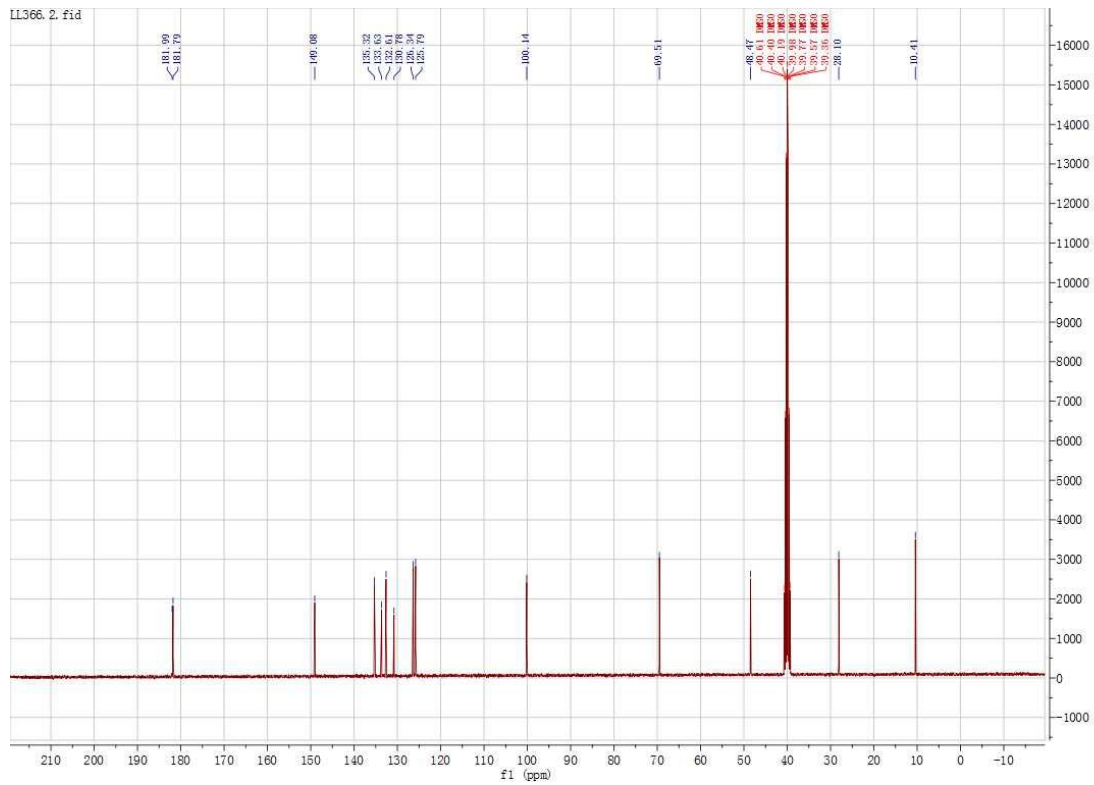

$^{13}\text{C}$  NMR of 3v

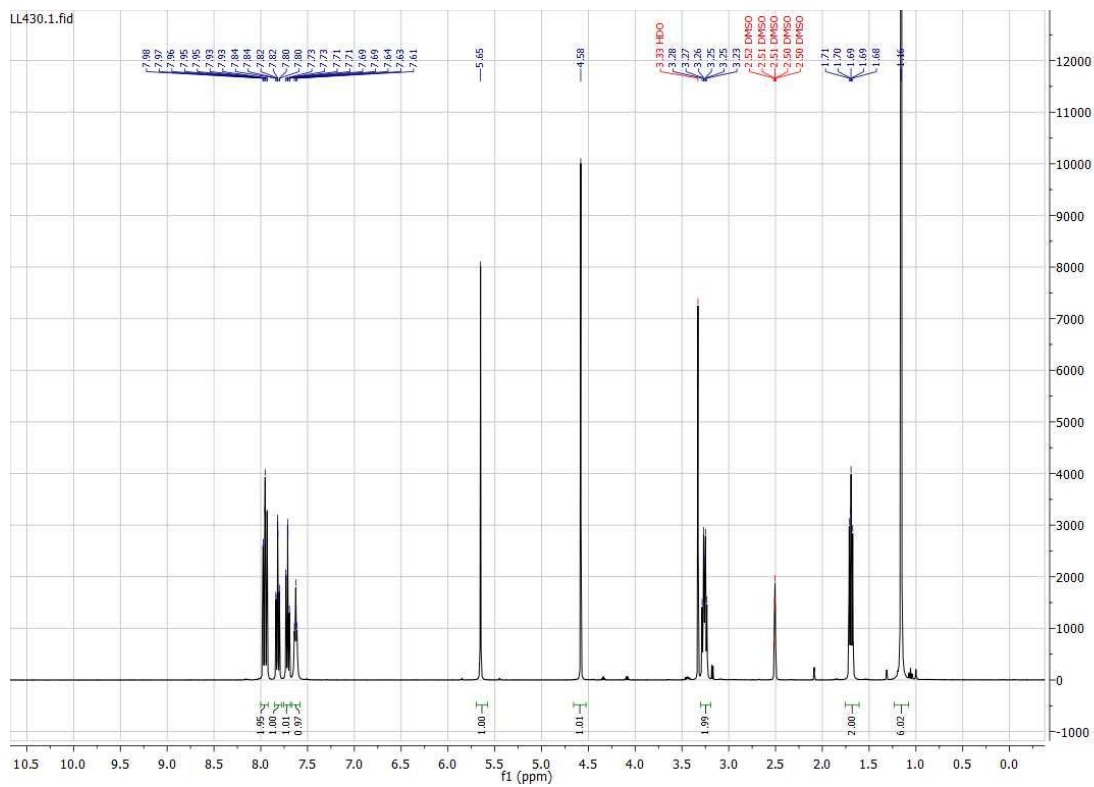

$^1\text{H}$  NMR of 3w

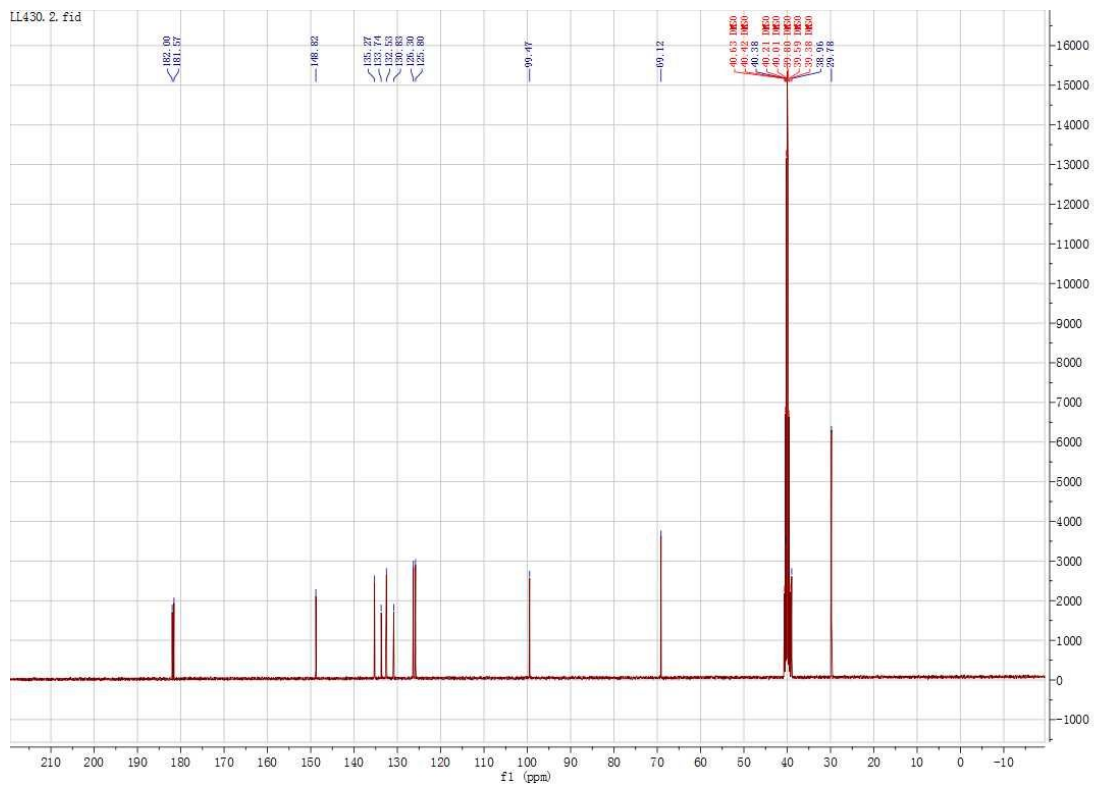

<sup>13</sup>C NMR of 3w

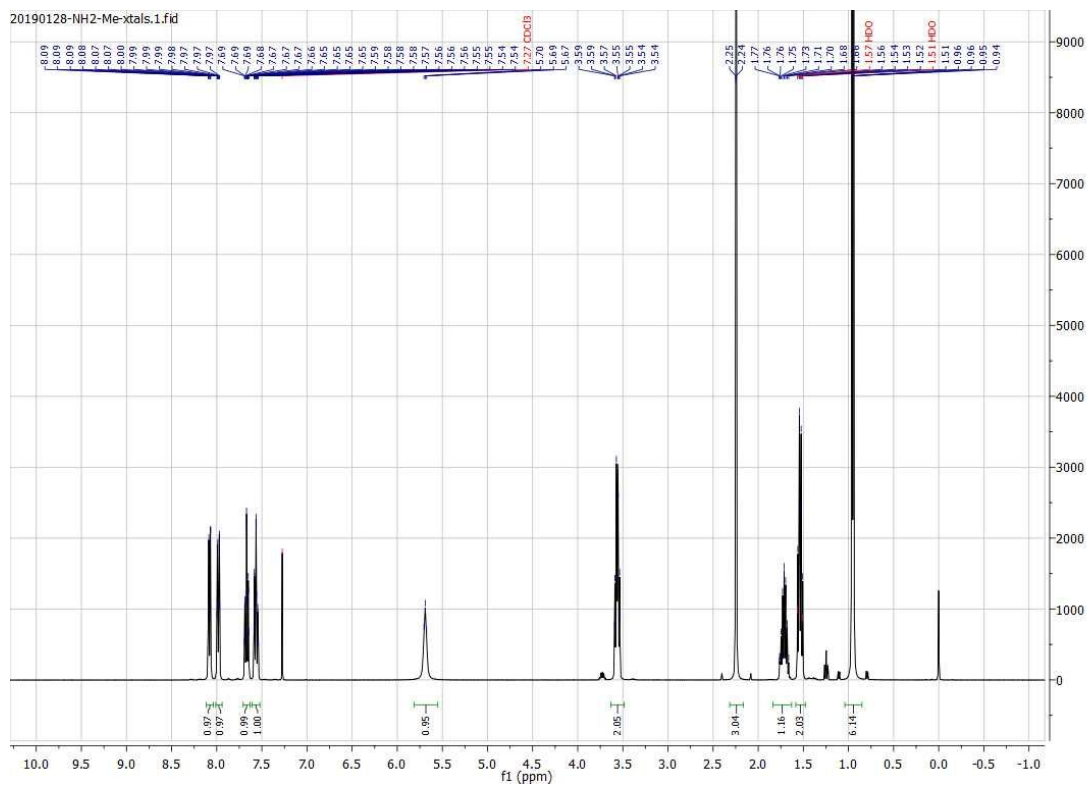

<sup>1</sup>H NMR of 5a

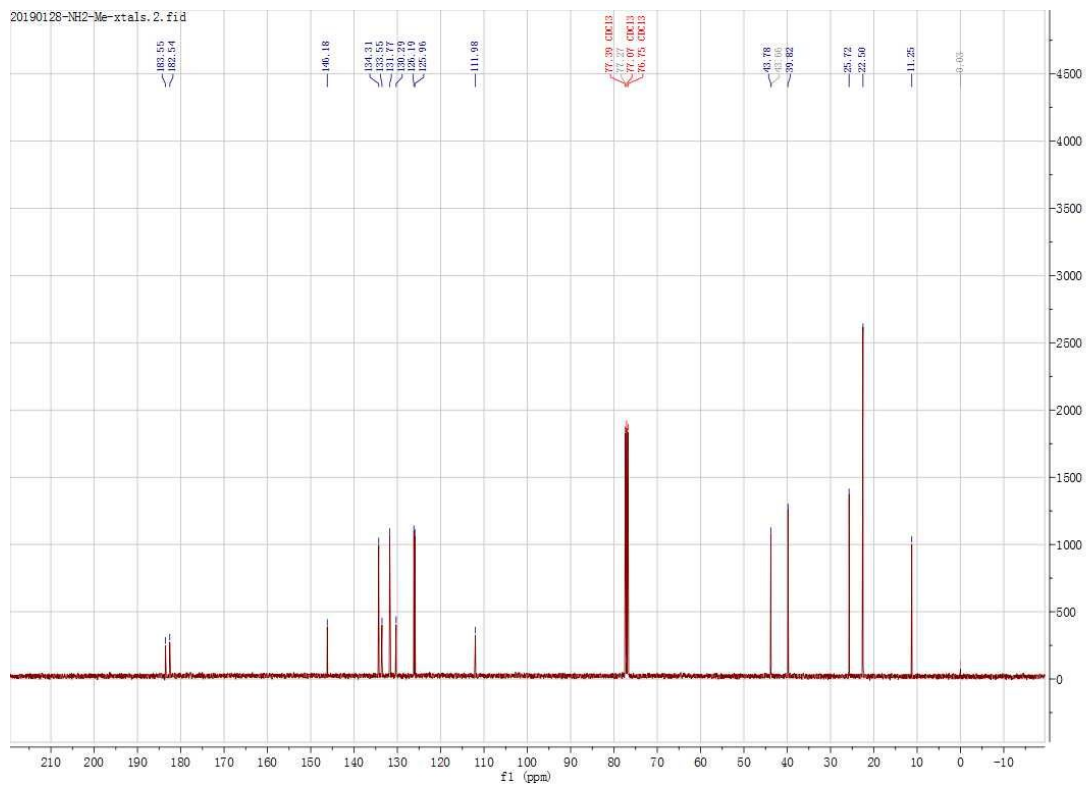

$^{13}\text{C}$  NMR of 5a

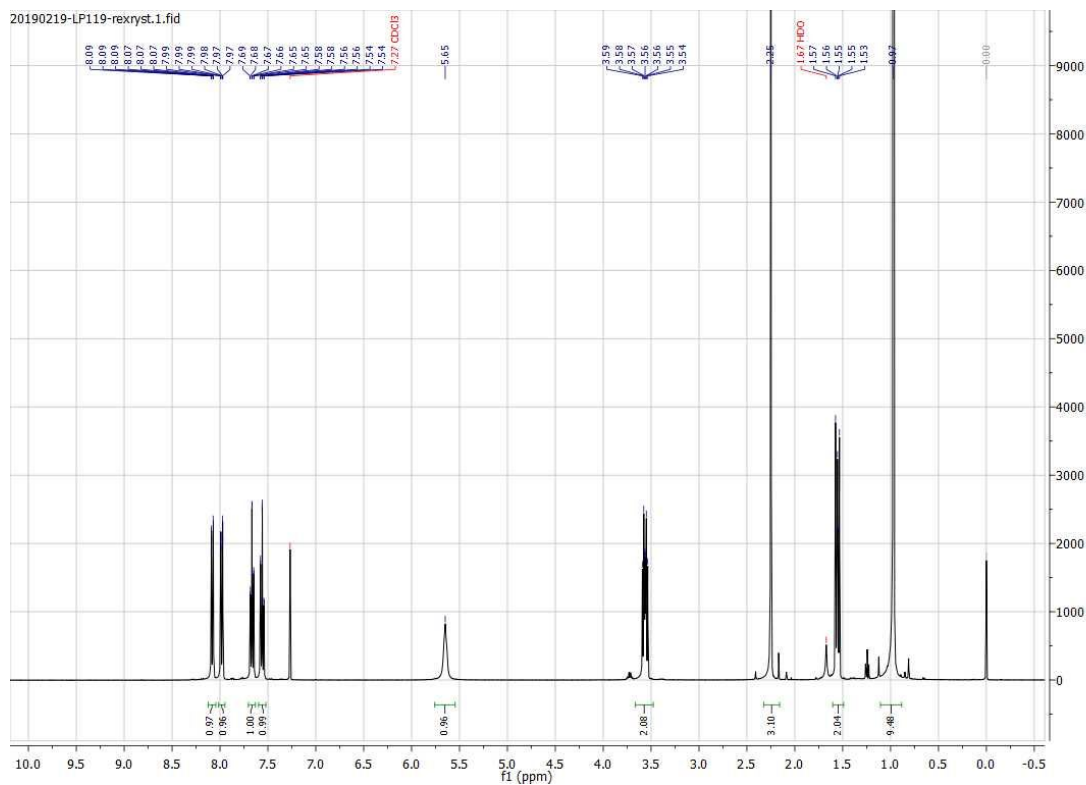

$^1\text{H}$  NMR of 5b

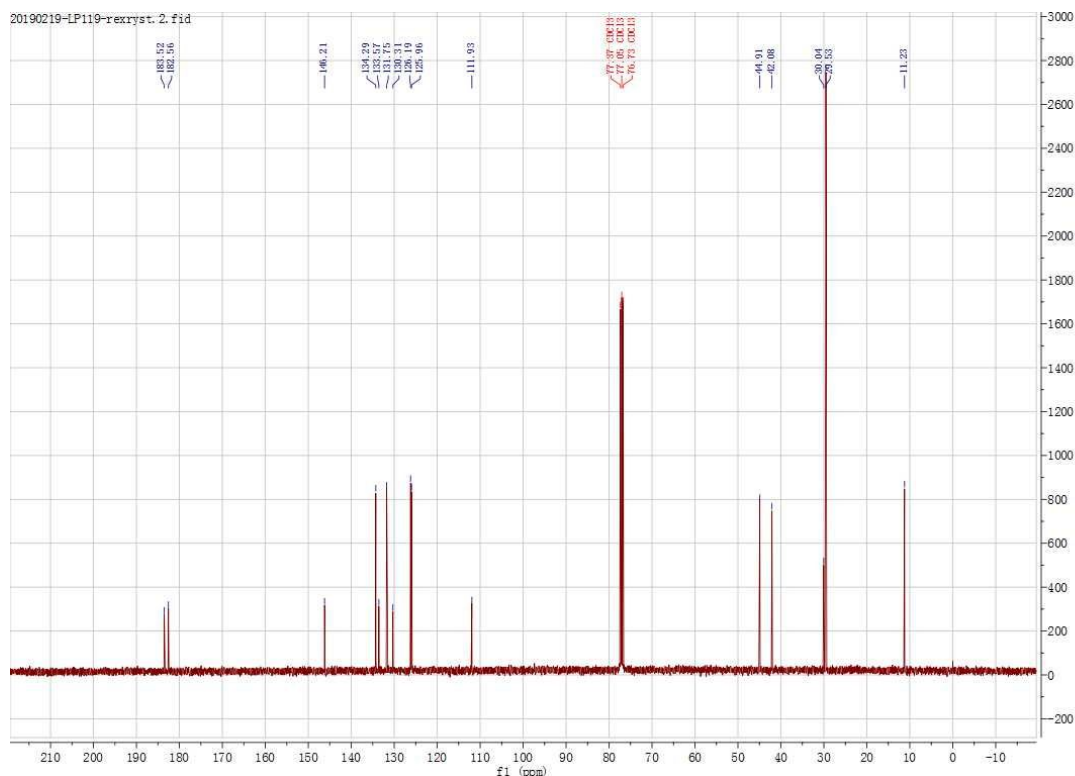

$^{13}\text{C}$  NMR of 5b

### HPLC traces and purity of the target compounds

All target compounds are at least 95% pure as confirmed via UV detection of ESI LCMS, performed on an Agilent 1100 HPLC instrument using an ODS HYPERSIL column (5 $\mu\text{m}$ , 4.6 mm  $\times$  250 mm) with a gradient of water/methanol plus 0.1% formic acid (3a-3w: 0-13 mins from 0% to 100% methanol, 13-14 mins: from 100% to 0% methanol. 5a and 5b: 0-3minutes from 0% to 90% methanol, 3-17 mins from 90% to 100% methanol, and 17-18 mins from 100% to 0% methanol).

3a

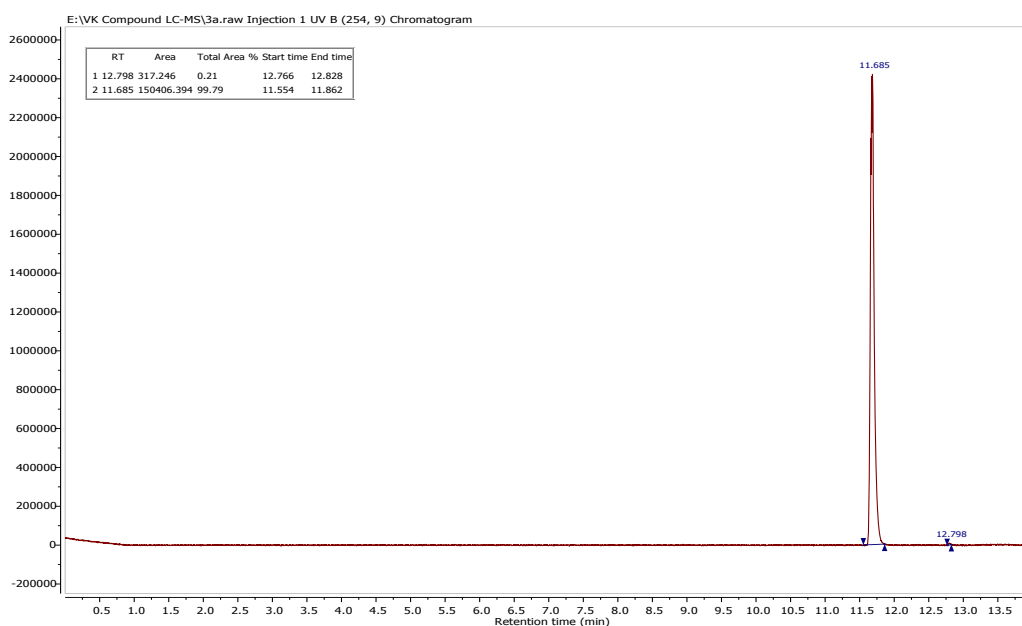

3b

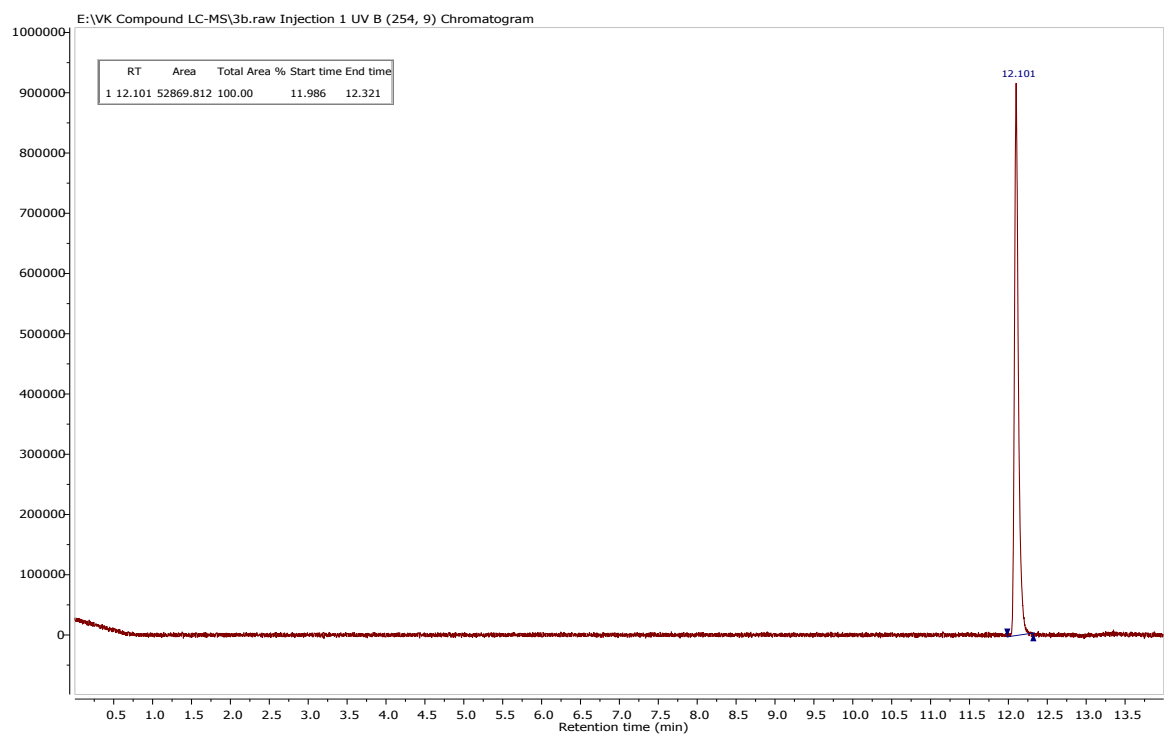

3c

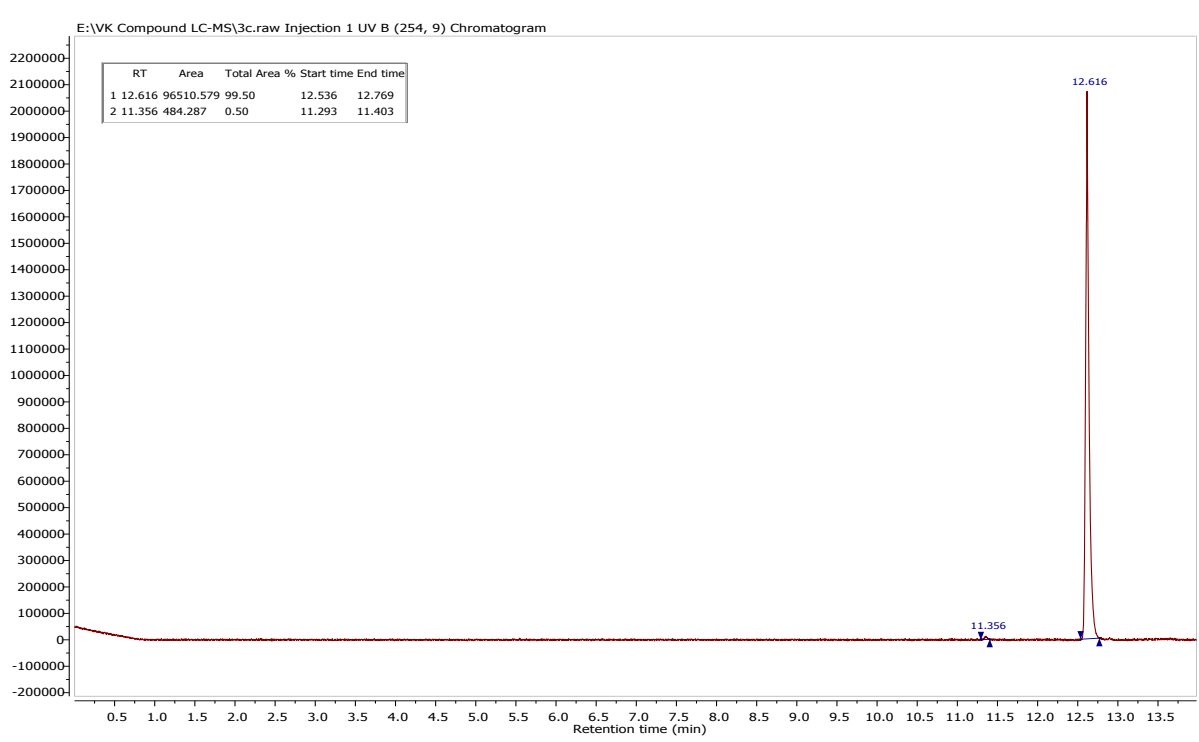



3d

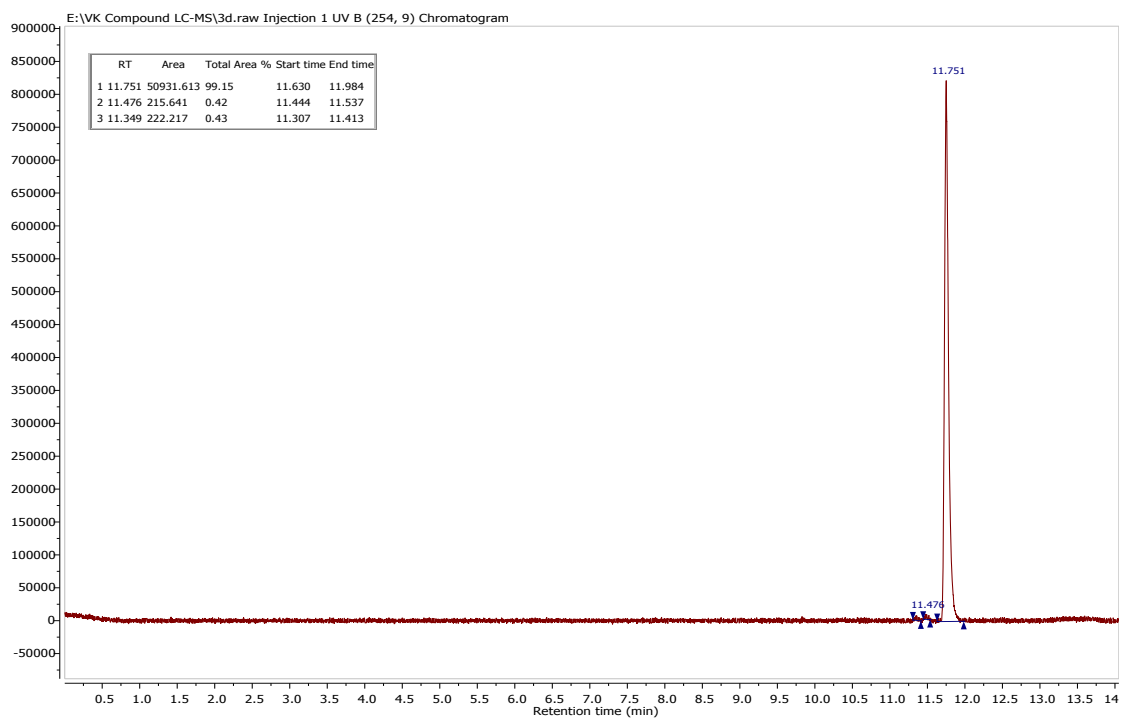

3e

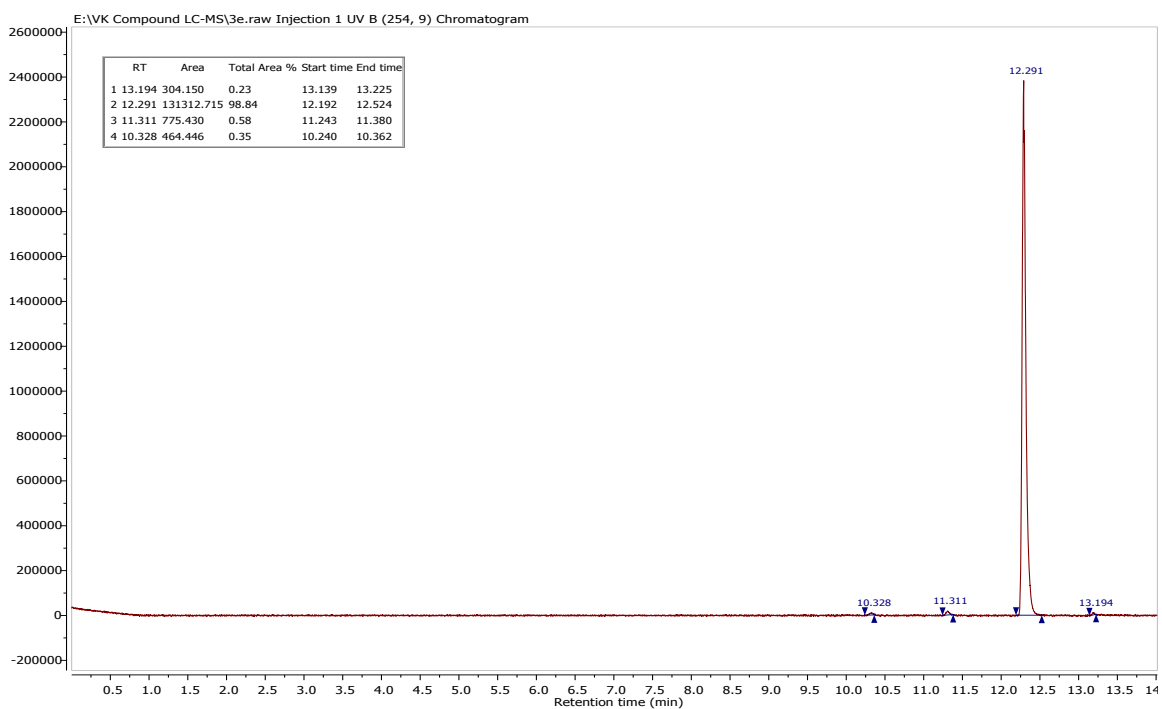

3f

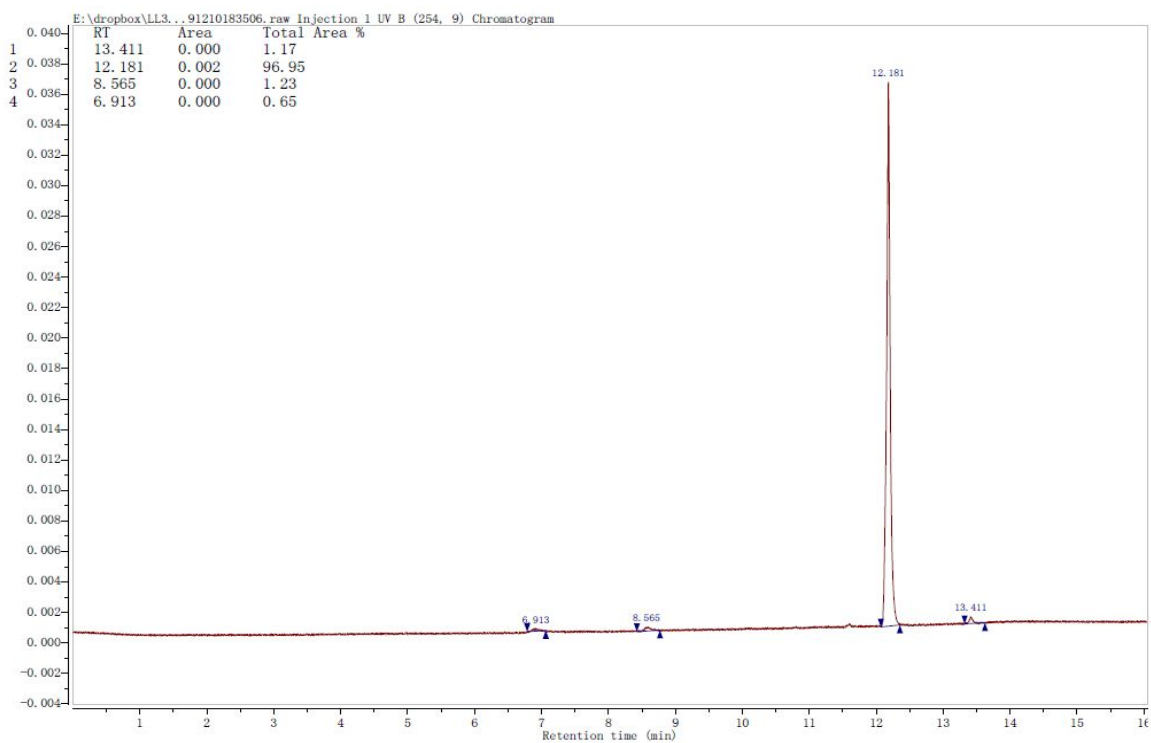

3g

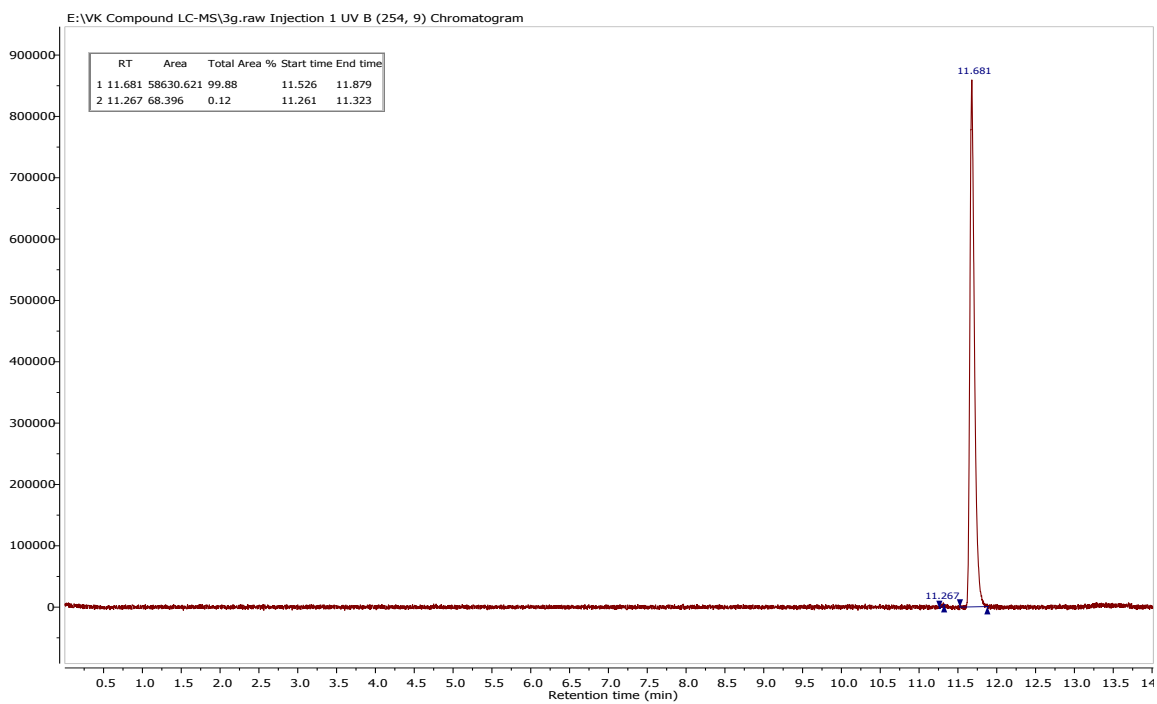

3h

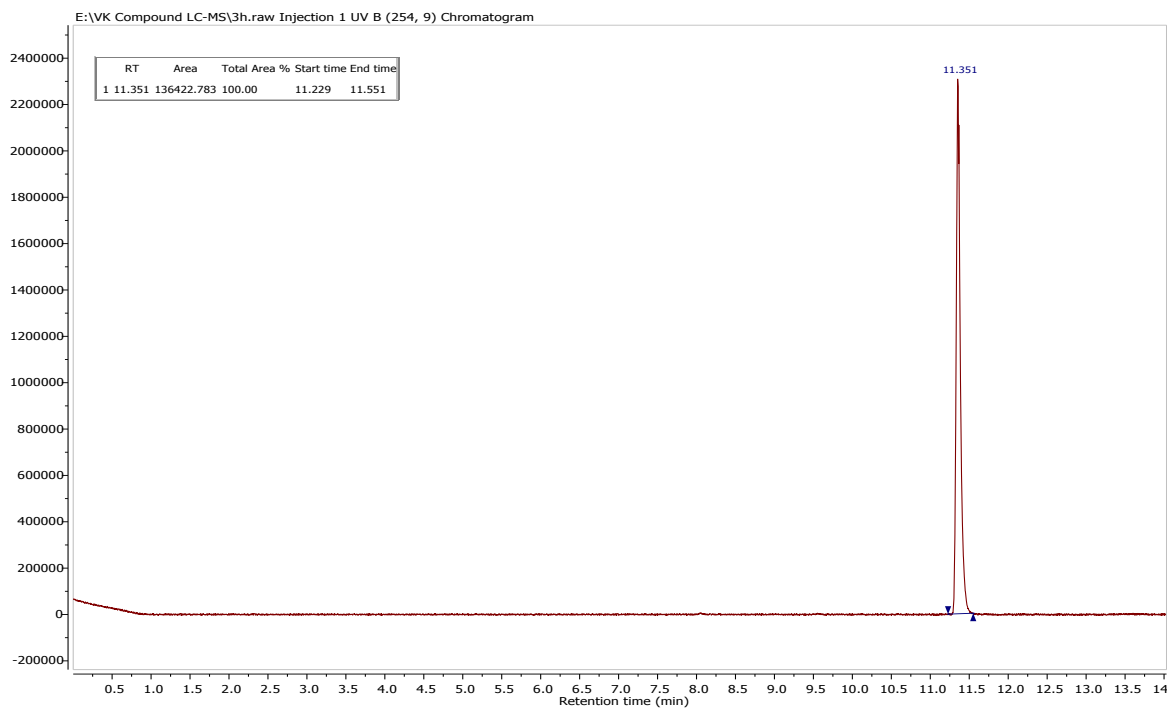

3i

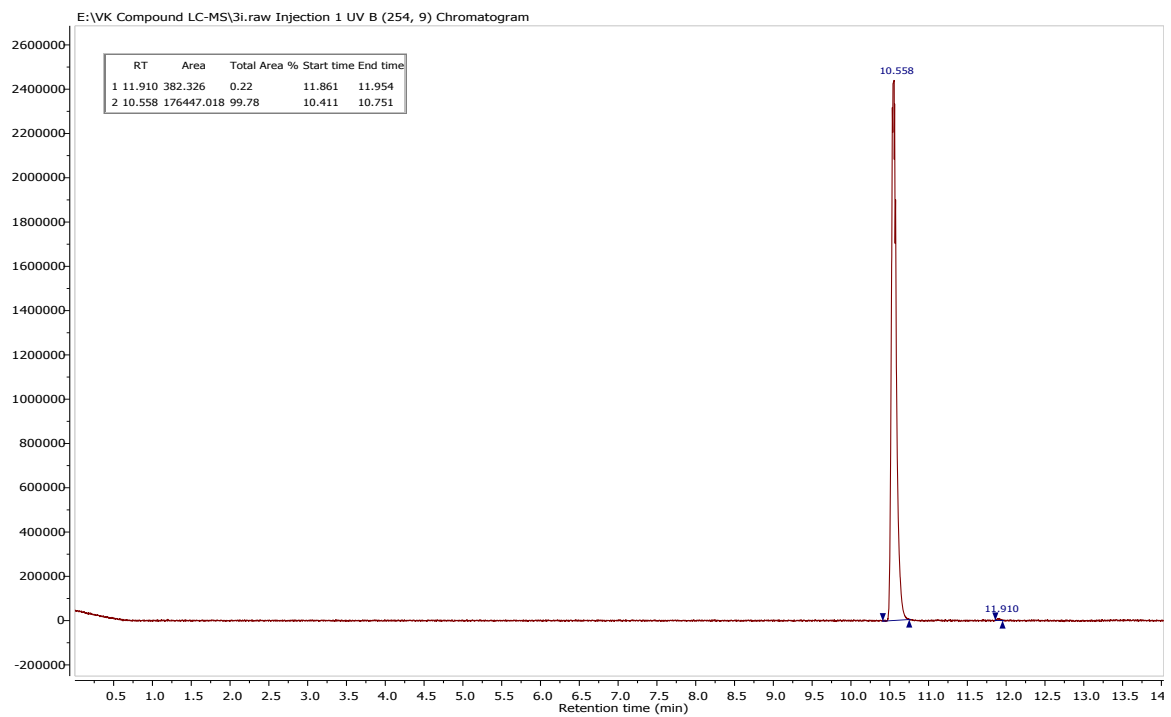

3j

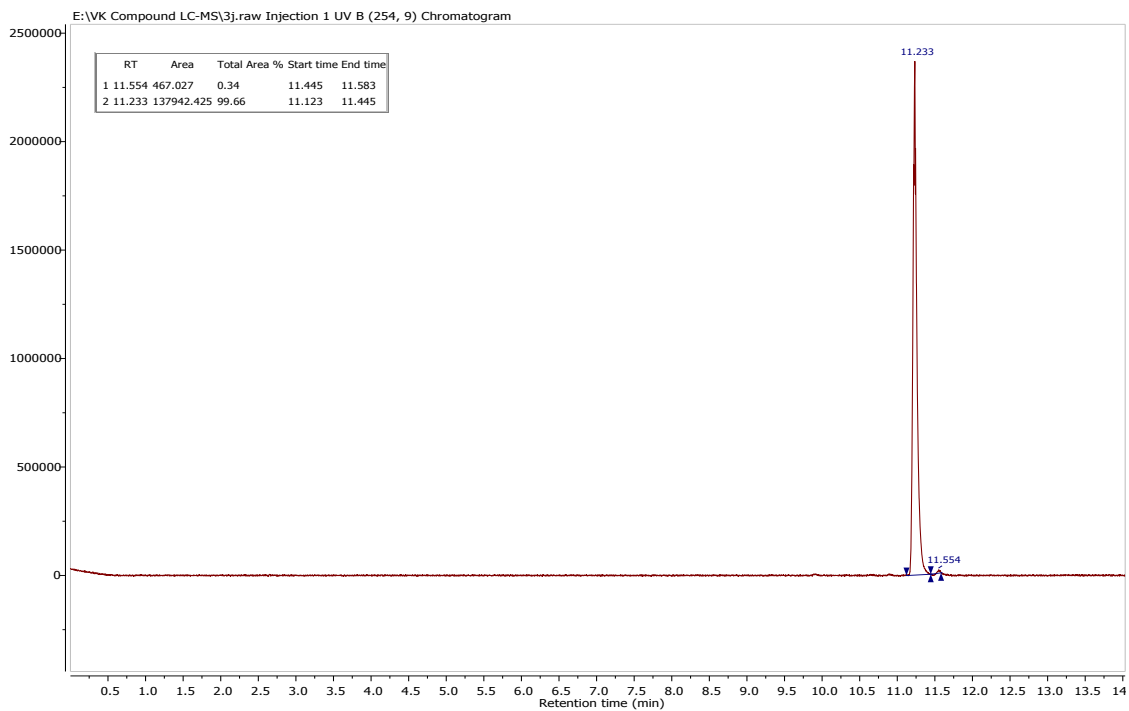

3k

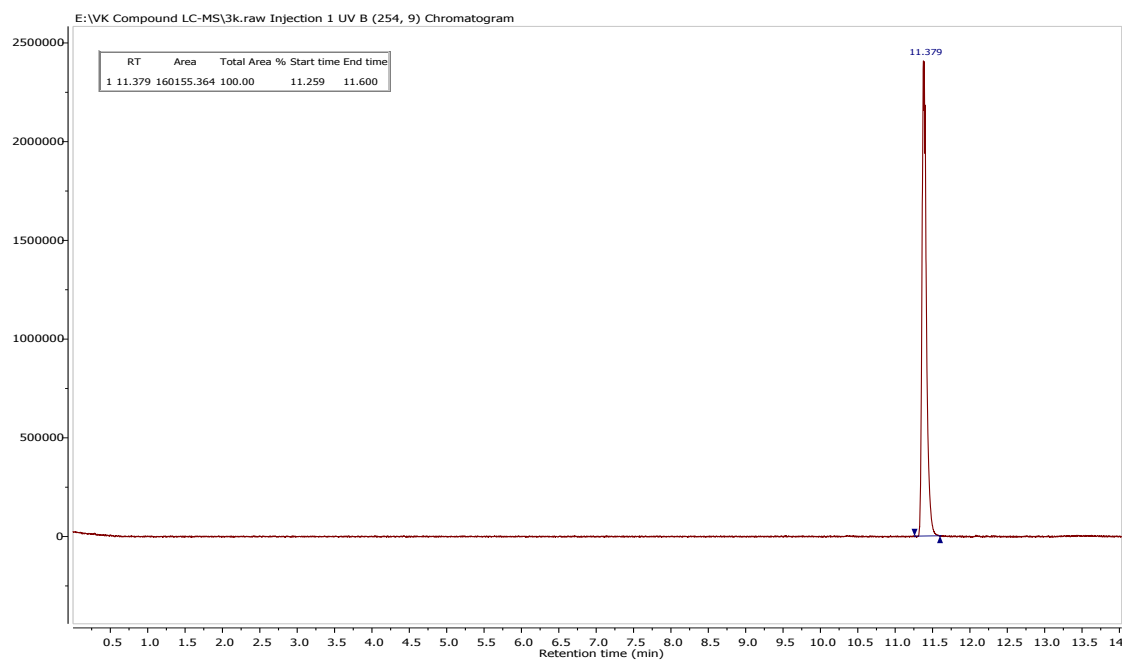

31

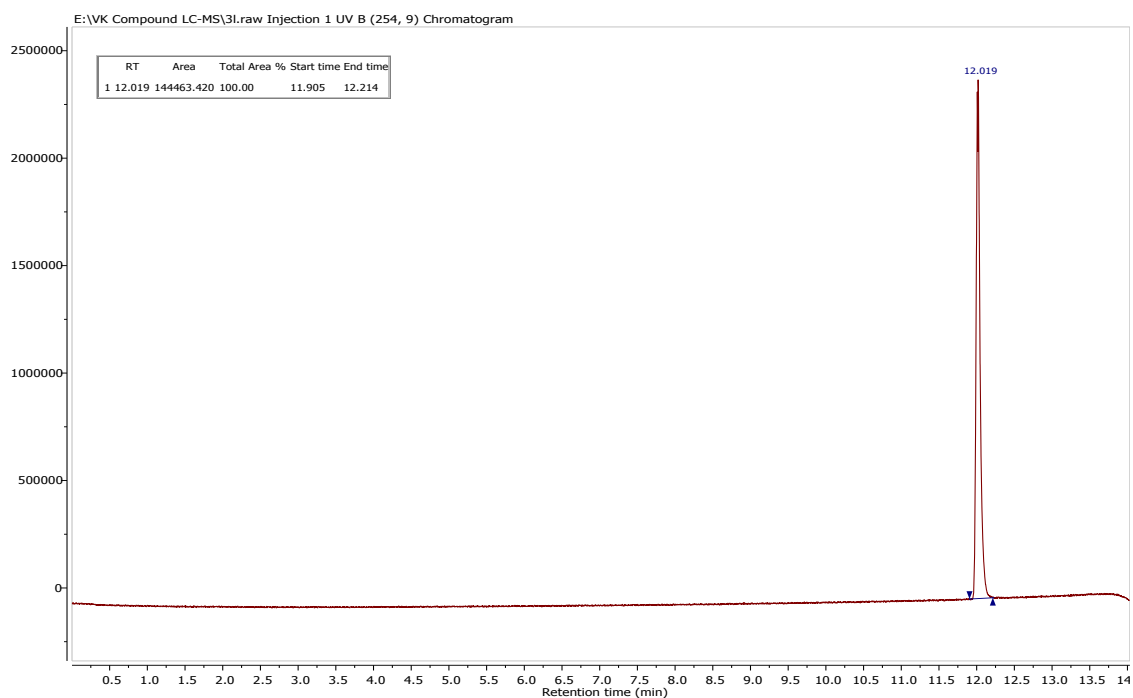

3m

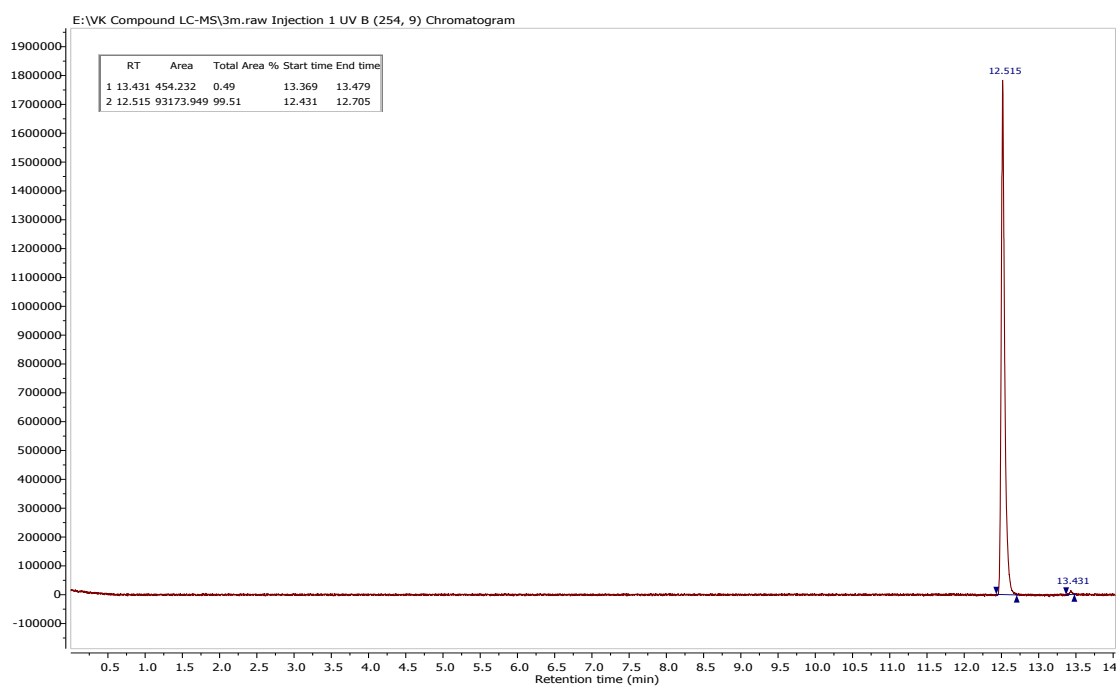

3n

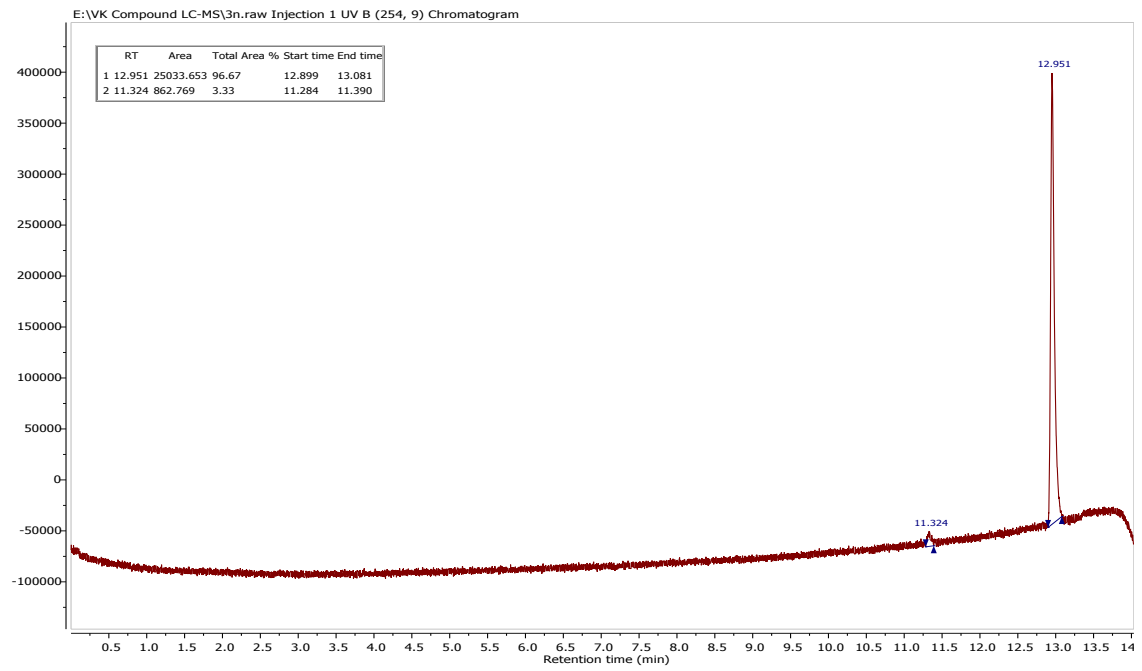

3o

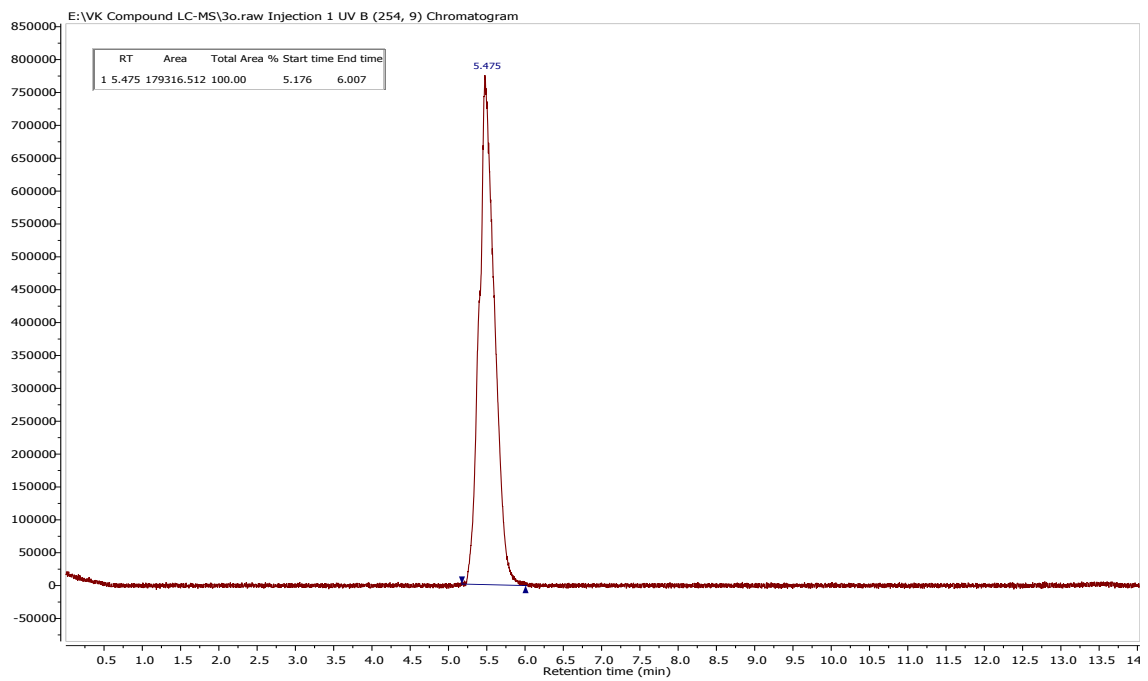

3p

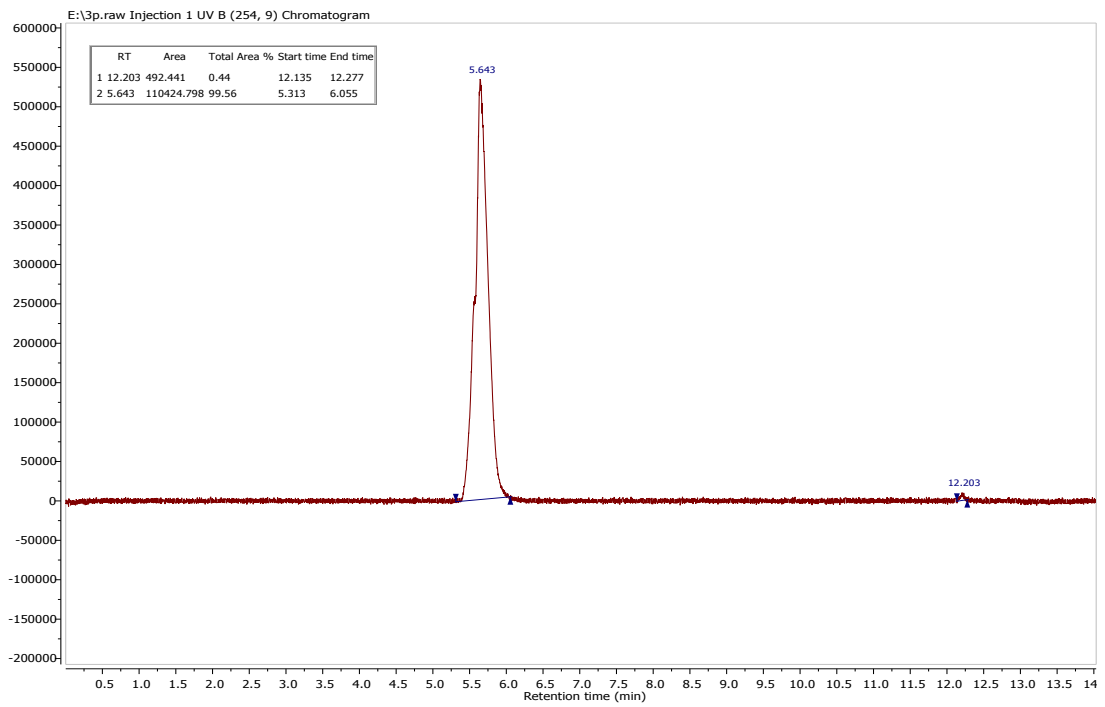

3q

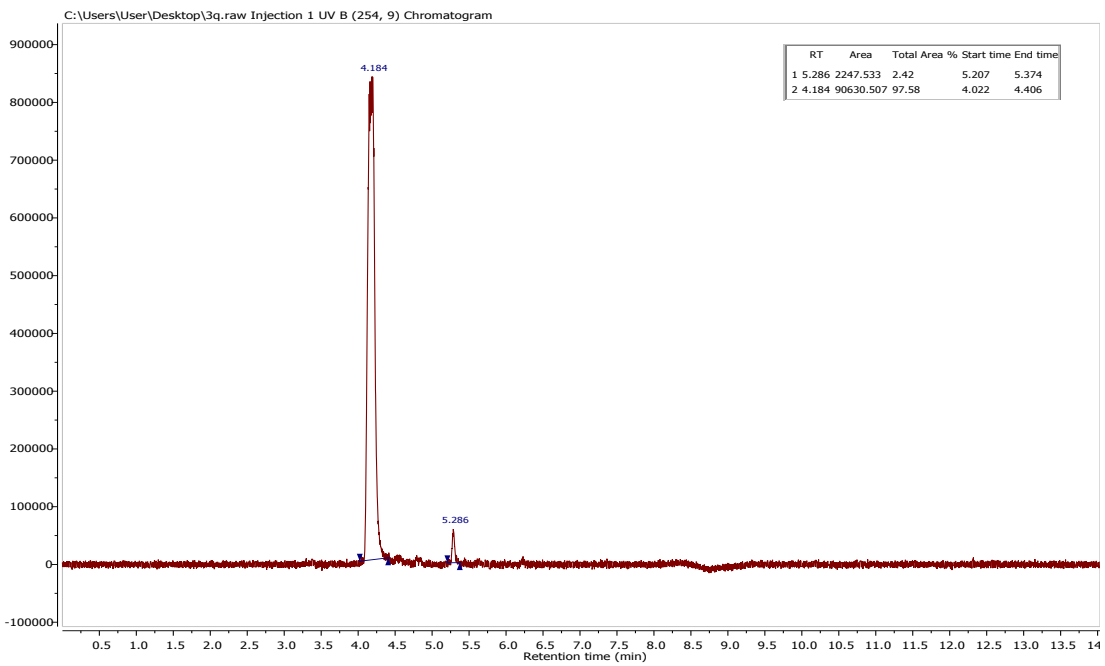

3r

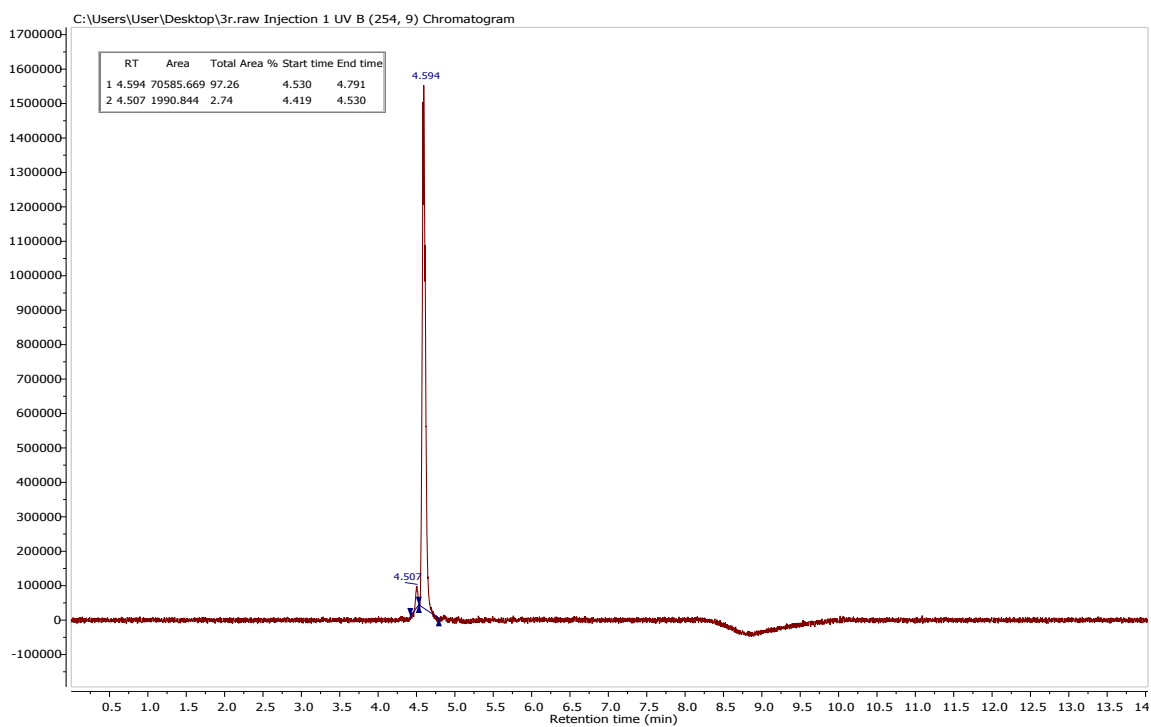

3s

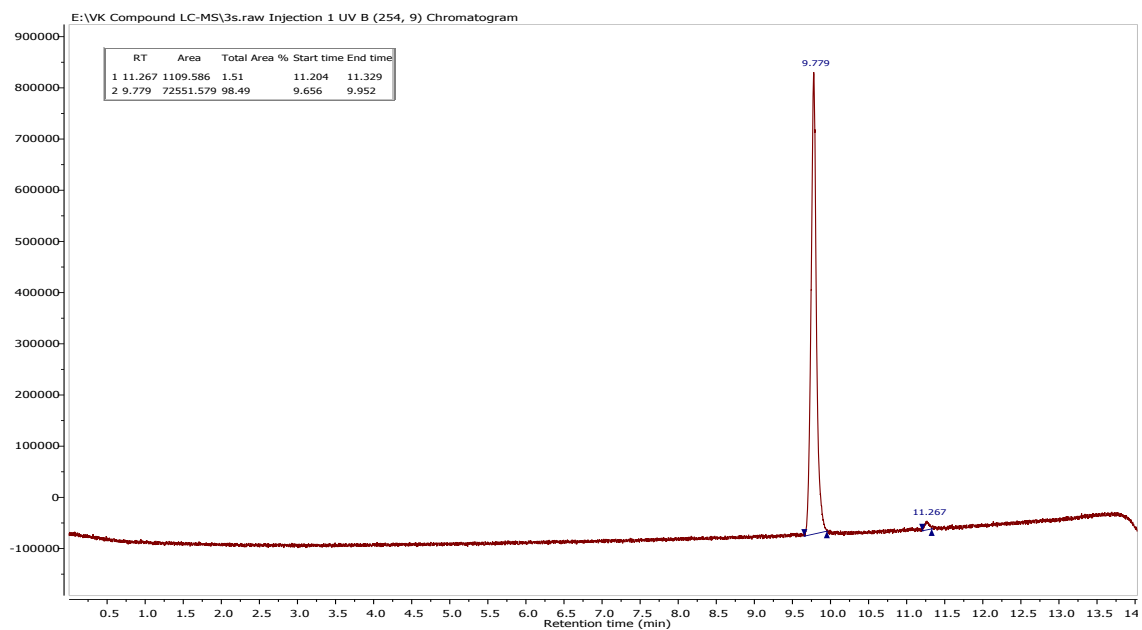



3t

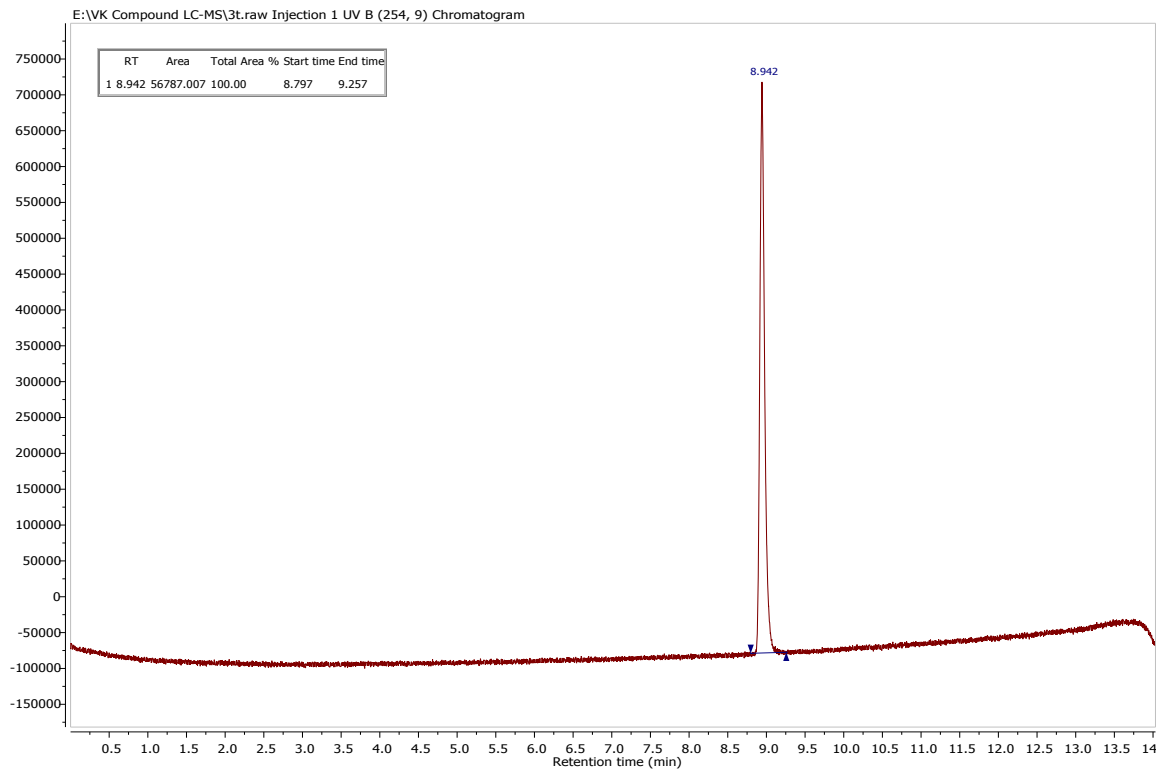

3u

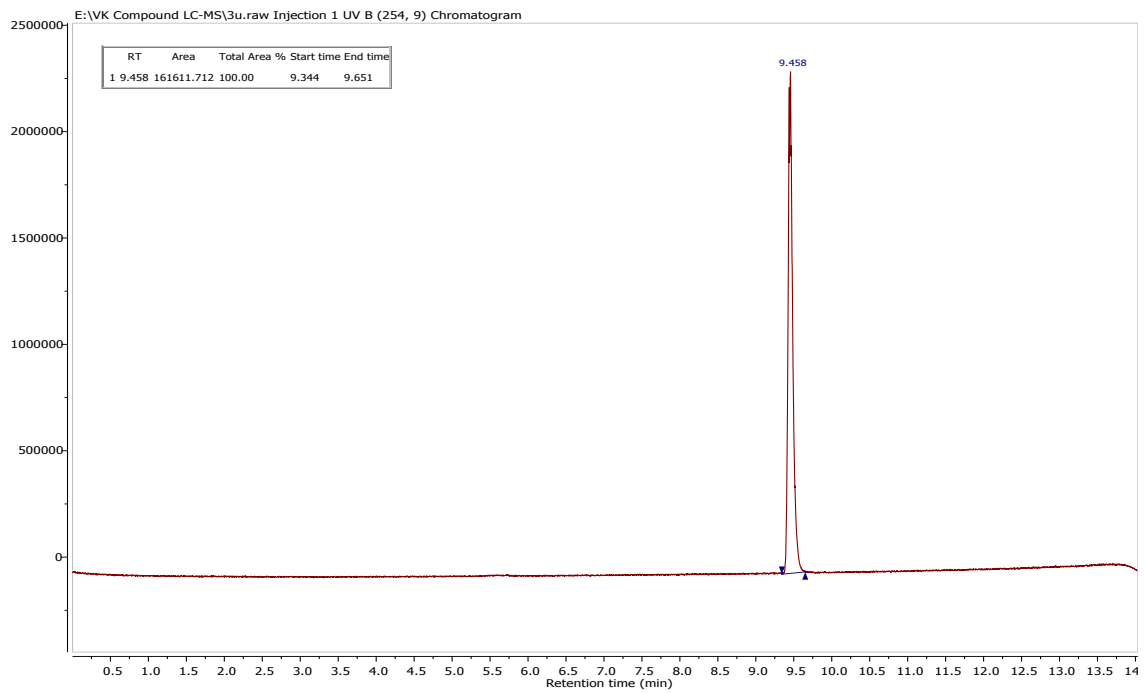

3v

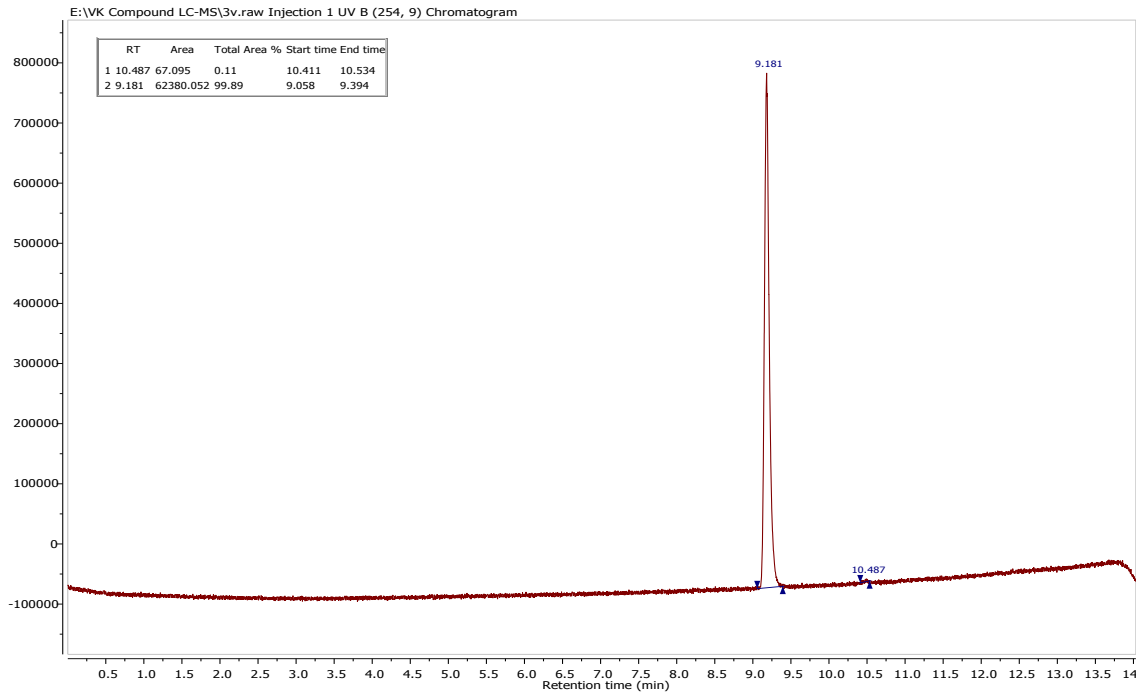

3w

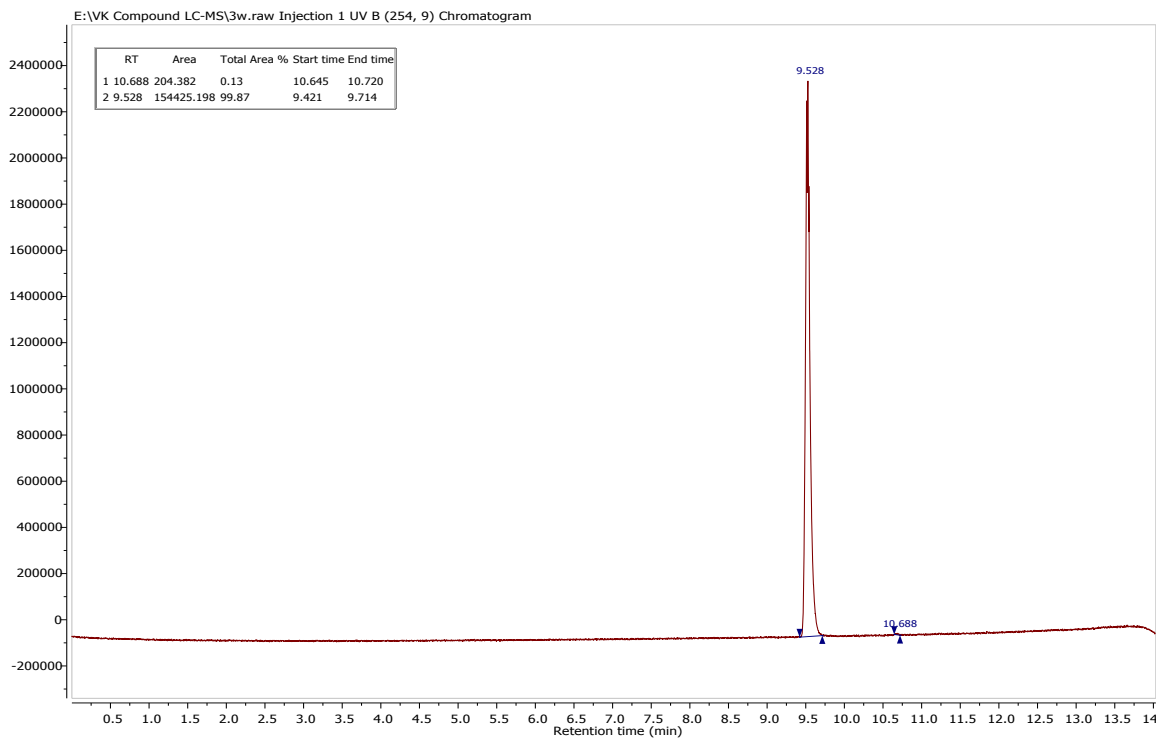

5a

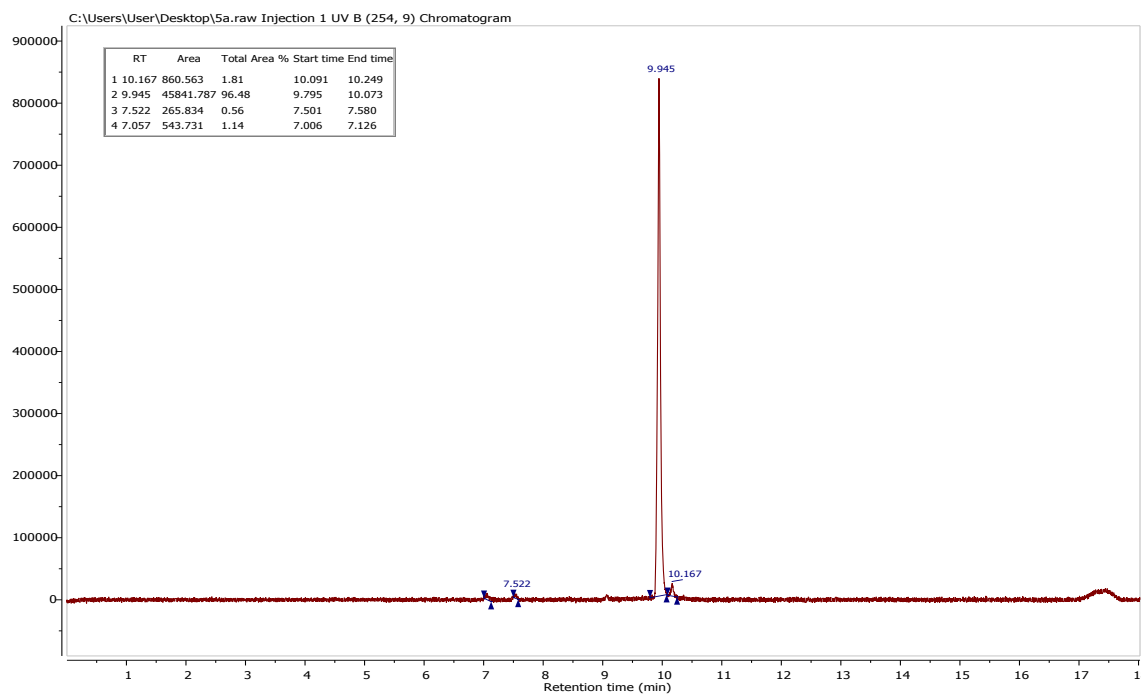

5b

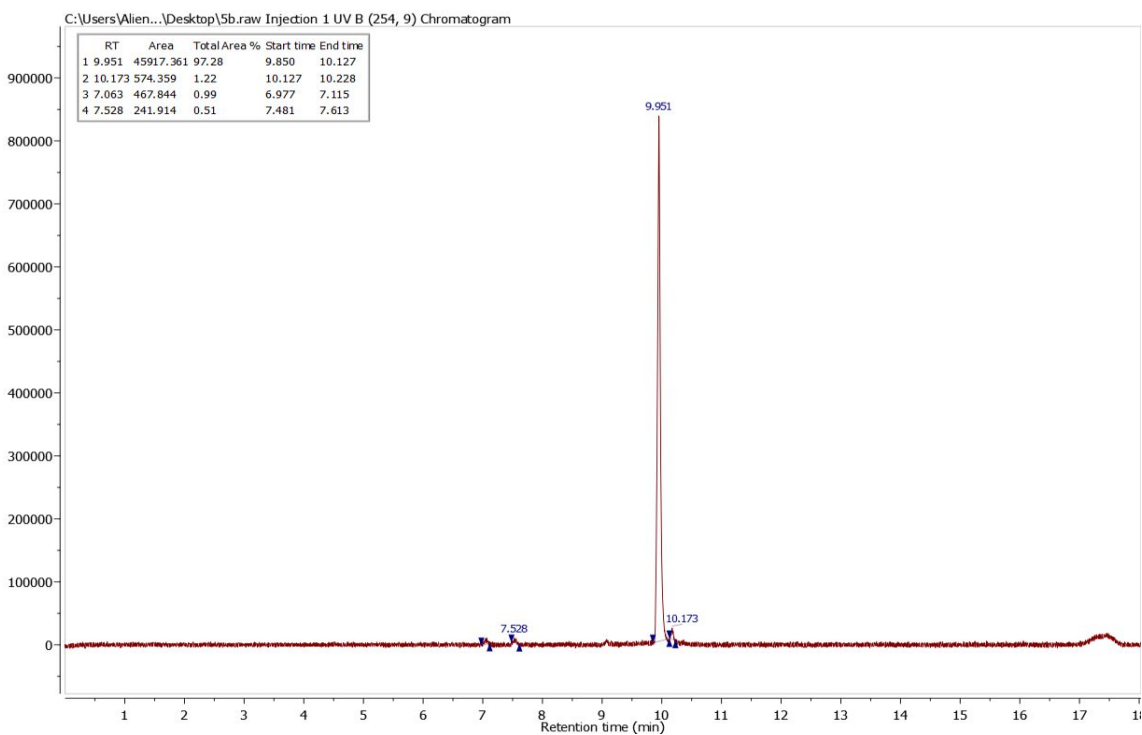

## Reference

- (1) West, P. J.; Saunders, G. W.; Billingsley, P.; Smith, M. D.; White, H. S.; Metcalf, C. S.; Wilcox, K. S. Recurrent epileptiform discharges in the medial entorhinal cortex of kainate-treated rats are differentially sensitive to antiseizure drugs. *Epilepsia*. **2018**, *59*, 2035-2048.
- (2) Shultz, M. D.; Cao, X.; Chen, C. H.; Cho, Y. S.; Davis, N. R.; Eckman, J.; Fan, J.; Fekete,

A.; Firestone, B.; Flynn, J.; Green, J.; Growney, J. D.; Holmqvist, M.; Hsu, M.; Jansson, D.; Jiang, L.; Kwon, P.; Liu, G.; Lombardo, F.; Lu, Q.; Majumdar, D.; Meta, C.; Perez, L.; Pu, M.; Ramsey, T.; Remiszewski, S.; Skolnik, S.; Traebert, M.; Urban, L.; Uttamsingh, V.; Wang, P.; Whitebread, S.; Whitehead, L.; Yan-Neale, Y.; Yao, Y. M.; Zhou, L.; Atadja, P., Optimization of the in vitro cardiac safety of hydroxamate-based histone deacetylase inhibitors. *J. Med. Chem.* **2011**, *54*, 4752-4772.
